# Supplementary material for: The Physical and Genetic Framework of the Maize B73 Genome
Source: PLoS Genet. 2009 Nov 20;5(11):e1000715. doi: 10.1371/journal.pgen.1000715 (PMC2774505; doi:10.1371/journal.pgen.1000715)
Supplement: Table S1 — MTP clones and their physical position, sequence characteristics, and overlap information. (2.82 MB XLS) [file pgen.1000715.s001.xls]

## Sheet: MTP_clone_list
Table S1. MTP clones and their physical position, sequence characteristics, and overlap Information
#CLONE	Chr	Agarose CTG	Agarose left	Agarose right	HICF CTG	HICF left	HICF right	GenBank AC#	Seq Length	BAC2BAC Overlapping Length	BES2BAC (%)		additional_GB_AC
											Previous	Next
c0055P12	1	1	3	44	2	809	930	AC177838	206532	22631		99.89
c0382J10	1	1	40	74	2	721	830	AC194120	156033	6759	98.61	99.87
c0014I07	1	1	72	107	2	639	745	AC204887	194636	55033	98.99	0
c0320M06	1	1	101	125	NA	NA	NA	AC217168	116618	32196	99.45	98.13
b0218N09	1	1	119	140	2	508	638	AC195936	137547	60320	99.44	99.87
c0004E01	1	1	121	158	2	462	590	AC206949	188130	12842	97.8	98.36
c0205J24	1	1	166	204	2	370	475	AC177895	175315	70443	99.43	100
c0104D10	1	1	193	231	2	287	406	AC191595	195302	6076	99.85	98.66
b0394G24	1	1	227	256	2	223	320	AC202923	116349	55328	100	99.85
c0075I11	1	1	250	272	2	140	253	AC205093	182668	45670	100	99.75
b0542P21	1	1	296	313	2	58	173	AC204996	149658	35804	98.34	0
b0479A03	1	1	305	328	NA	NA	NA	AC225791	109519	0	99.46	98.1
c0453M09	1	1	316	340	NA	NA	NA	AC209978	100616	23056	0	99.86
b0318G19	1	1	338	361	NA	NA	NA	AC204084	140129	44690	99.32	0
c0059P07	1	1	355	384	NA	NA	NA	AC196950	178886	112530	99.05	99.87	AC155516
c0320K16	1	1	364	400	1	9	124	AC193500	188565	22563	99.74	99.83
b0231H08	1	1	398	429	1	137	217	AC190658	134118	11433	99.66	99.87
c0363D20	1	1	428	469	1	205	343	AC194148	184722	69538	97.11	99.42
c0252A11	1	1	450	490	1	281	420	AC195844	165876	16650	99.27	99.73
b0313O01	1	1	478	513	1	373	481	AC190739	143703	Right end	99.16		AC155446
c0043J21	1	2	0	35	159	11	131	AC196173	164329	50706		99.43
c0121M23	1	2	37	70	159	158	319	AC206878	193452	15055	99.04	99.21
c0131O10	1	2	62	83	159	295	393	AC203871	139161	62986	99.33	98.83
b0105G05	1	2	78	100	NA	NA	NA	AC217357	153502	66463	99.84	99.13
c0121K16	1	2	86	116	159	378	521	AC212723	197162	69175	97.66	95.94
c0178F14	1	2	112	146	3	32	132	AC186330	166662	31460	99.61	99.86
b0577A04	1	2	142	166	3	74	223	AC194374	125346	603	99.26	0
c0204L05	1	2	167	195	NA	NA	NA	AC209458	168969	17851	99.66	97.96
b0538I19	1	2	203	222	3	296	396	AC193371	134719	Right end	99.87
b0108P10	1	3	2	33	4	9	110	AC189074	151789	23561		100
c0103P04	1	3	28	60	4	120	246	AC194482	216791	176747	99.87	99.87
c0491P06	1	3	30	45	4	55	200	AC194029	199646	30442	99.86	99.86
b0182J06	1	3	40	72	NA	NA	NA	AC219091	119383	66613	99.87	99.86
c0282J11	1	3	53	88	4	203	325	AC197075	175601	31883	98.68	99.85
c0245A03	1	3	83	118	NA	NA	NA	AC194117	191086	31468	98.27	99.85
b0348A06	1	3	110	146	NA	NA	NA	AC190762	141588	16828	100	99.73
c0170B18	1	3	137	169	4	468	582	AC190721	171448	7484	100	98.57
c0430M07	1	3	171	202	4	562	673	AC191256	210698	900	99.51	100
c0235C22	1	3	200	232	4	684	797	AC191351	189438	24130	98.97	100
c0292L05	1	3	215	272	4	776	923	AC194220	217692	39906	100	0
c0161G04	1	3	267	302	4	881	1002	AC194428	188977	12128	98.02	98.87	AC155554
c0332O07	1	3	280	333	4	960	1124	AC213773	259169	37392	99.43	0
b0378F10	1	3	328	353	4	1051	1187	AC190825	145486	60086	99.17	99.59
c0021F05	1	3	343	375	4	1133	1235	AC193998	187501	57109	99.75	99.45
c0180I02	1	3	358	388	NA	NA	NA	AC217946	149689	69192	100	97.71
c0419D22	1	3	370	405	4	1237	1393	AC191725	190010	166112	99.77	0
c0067F07	1	3	380	412	4	1253	1391	AC201794	170624	57785	99.22	99.22
c0043C18	1	3	401	431	4	1339	1488	AC190951	191700	Right end	0
b0518C23	1	4	4	31	5	0	82	AC190784	125019	54381		100
c0031A16	1	4	21	55	5	47	153	AC190890	157103	11746	98.53	99.6	AC155502
b0448P23	1	4	50	74	5	142	213	AC190839	139830	30228	99.83	100	AC155456
c0023F20	1	4	67	111	5	178	299	AC214047	242910	64282	98.66	99.72
c0373O14	1	4	98	140	5	254	403	AC193473	207257	32788	100	97.76
c0530H10	1	4	129	164	5	352	458	AC195203	163072	36519	99.11	99.72	AC155632
c0021N17	1	4	154	195	NA	NA	NA	AC195797	188762	14840	99.63	98.64
b0262D19	1	4	192	210	14	825	918	AC190680	105394	19166	99.34	98.81	AC155435
c0477G13	1	4	206	240	5	613	732	AC191330	158119	9241	99.66	96.76	AC155630
b0329E12	1	4	239	259	5	694	826	AC201968	165217	33581	99.87	99.75	AC155447
c0573J07	1	4	255	288	5	798	910	AC195193	158684	22593	98.92	99.22
c0268C14	1	4	283	324	5	888	1017	AC195884	200570	15005	98.54	100
c0280L05	1	4	331	368	5	997	1108	AC195940	180219	22076	96.77	100
c0281I14	1	4	369	405	5	1084	1204	AC194275	149945	1504	100	97.79
b0467F05	1	4	403	432	5	1142	1301	AC190859	131337	16755	100	99.61	AC155459
c0476C14	1	4	422	462	5	1295	1403	AC190975	188610	68486	99.48	94.37	AC155629
c0391N24	1	4	448	476	NA	NA	NA	AC155624	149282	14331	100	99.46
c0173B05	1	4	478	502	5	1437	1575	AC212892	157374	12806	98.78	97.22	AC155569
c0339P04	1	4	525	565	5	1578	1716	AC194863	200940	1306	99.86	97.85
b0234I10	1	4	563	592	5	1715	1806	AC190659	161451	37135	99.72	98.8	AC155428
b0135N12	1	4	586	613	5	1880	2010	AC190558	153476	29384	100	99.08
b0491E20	1	4	613	655	5	2008	2135	AC190799	197919	12261	99.85	97.35
c0343F21	1	4	651	691	5	2111	2245	AC197564	208706	33758	100	98.52
c0399B23	1	4	700	731	5	2268	2372	AC202528	182512	45537	99.56	96.03
c0183M02	1	4	726	758	5	2373	2514	AC196180	179610	55878	99.18	95.18
c0360C06	1	4	742	779	5	2457	2594	AC194145	148650	19890	98.34	97.88
b0121F23	1	4	776	802	NA	NA	NA	AC226713	121260	1274	96.44	99.86
b0372G08	1	4	792	813	5	2616	2772	AC190794	129930	85290	99.63	100
b0233F07	1	4	801	828	5	2661	2791	AC194655	158543	19106	99.5	99.87
b0564F11	1	4	810	830	5	2747	2888	AC190706	127877	Right end	100
c0151B16	1	5	0	36	6	743	911	AC186233	171466	61987		99
c0539G21	1	5	27	47	6	705	800	AC192169	135018	38048	100	98.05
c0199G04	1	5	46	80	6	609	737	AC197264	184968	4543	94.72	99.55
c0310H16	1	5	74	106	NA	NA	NA	AC225809	148442	41727	99.34	99.87
c0389P22	1	5	94	135	6	442	570	AC195687	181213	16626	95.02	99.37
b0575E15	1	5	150	182	6	357	456	AC191175	194543	104215	98.26	99.54
c0085G22	1	5	160	201	NA	NA	NA	AC198979	205042	199491	99.53	99.84
c0120H08	1	5	160	203	6	270	378	AC177928	211936	76352	97.9	99.59
c0418A01	1	5	193	226	6	200	317	AC193452	185806	101862	97.71	99.46	AC148166
b0303O19	1	5	204	231	6	185	281	AC190735	132712	111755	99.86	100
c0042L16	1	5	208	245	NA	NA	NA	AC199214	188625	113457	97.15	99.75
c0107L08	1	5	226	259	6	97	209	AC191327	194000	55535	99.88	99.74
c0294E10	1	5	255	283	6	13	130	AC208223	144710	143135	99.52	100
c0103L07	1	5	260	300	6	0	138	AC209858	172692	45041	0	98.74
c0107C14	1	5	282	314	NA	NA	NA	AC232222	164653	83057	99.14	0
b0227J07	1	5	313	340	7	64	159	AC190650	119425	7547	100	100
c0525B23	1	5	354	397	7	125	262	AC177874	203769	135653	98.81	99.77
c0238P14	1	5	361	401	NA	NA	NA	AC205622	179815	38042	0	98.93
c0438O07	1	5	387	421	7	216	351	AC191040	185231	32193	98.46	100
c0397L06	1	5	414	444	7	310	425	AC202161	166642	71187	97.45	98.54
c0239G09	1	5	428	467	7	366	496	AC211971	155011	75418	99.59	97.64
b0269D18	1	5	454	482	7	423	539	AC211517	168210	8867	94.56	99.05
c0071C02	1	5	500	528	7	518	618	AC191043	157626	52092	99.74	99.02
c0140E02	1	5	516	552	NA	NA	NA	AC177915	366490	63810	99.27	99.58
c0347P19	1	5	541	572	7	647	768	AC202065	197097	67048	98.82	98.25
c0375L12	1	5	563	591	7	703	825	AC209922	178591	68872	98.01	92.18
b0290A24	1	5	578	604	NA	NA	NA	AC217378	167819	27336	99.45	99.06
c0120D10	1	5	594	636	NA	NA	NA	AC195260	210806	41013	97.95	99.85
c0382J22	1	5	629	657	7	991	1090	AC186417	141880	Right end	99.87
b0480E13	1	6	0	28	NA	NA	NA	AC187207	229375	27018		99.59
c0528D02	1	6	33	65	NA	NA	NA	AC210834	199383	35078	98.13	98.03
c0397N22	1	6	55	76	8	142	236	AC201773	163547	32254	99.12	100
c0400P17	1	6	83	113	8	209	326	AC196712	164333	23978	99.48	99.03
c0322A07	1	6	104	142	8	295	412	AC191284	171823	48870	99.87	99.4
c0009K17	1	6	125	171	NA	NA	NA	AC177852	202196	79267	99.88	98.77
c0026A01	1	6	154	184	8	458	540	AC190615	199794	39478	100	99.24	AC145728
c0008L01	1	6	179	217	8	548	659	AC196111	205804	68679	99.63	99.48
c0056I10	1	6	198	229	8	593	713	AC200613	169035	5221	100	96.83
c0108H01	1	6	232	270	8	702	823	AC205178	170904	15690	100	99.24
c0264E15	1	6	262	285	8	797	873	AC209248	142400	83226	99.51	99.88
c0103G20	1	6	275	304	NA	NA	NA	AC218040	171728	66804	99.74	99.16
c0019O03	1	6	286	326	8	879	995	AC205142	186790	94687	96.12	99.42
c0011E23	1	6	308	347	8	920	1056	AC211214	230848	61088	99.57	98.87
c0107E10	1	6	334	374	8	1017	1136	AC209758	255040	23033	97	100
c0309N09	1	6	364	393	8	1102	1201	AC205103	141530	4249	98.61	98.38
c0480C20	1	6	390	423	8	1229	1360	AC203376	172352	17598	99.76	99.75
c0170C06	1	6	415	448	8	1325	1459	AC201823	178780	47989	98.88	98.05
c0175D12	1	6	449	486	8	1395	1506	AC196215	171187	55340	97.82	97.21
c0162D01	1	6	469	510	8	1478	1588	AC189098	195057	17675	96.08	98.79
b0643A06	1	6	508	537	8	1568	1657	AC200690	167693	109162	97.14	98.61
c0099E01	1	6	515	548	8	1562	1709	AC208653	174216	46056	99.5	99.46
c0027C20	1	6	552	581	NA	NA	NA	AC194882	187807	Right end	98.35
c0175H05	1	7	30	55	NA	NA	NA	AC226243	173829	35895		100
c0044B01	1	7	49	89	628	411	580	AC207881	183368	47491	98.74	98.07
b0333B20	1	7	80	102	628	391	487	AC196394	136033	22132	99.85	0
b0430F24	1	7	109	130	628	325	407	AC190838	175621	30009	99.06	99.59
c0151F11	1	7	129	164	NA	NA	NA	AC177911	173681	63815	96.1	99.42
b0577L06	1	7	149	176	NA	NA	NA	AC210111	117532	50389	99.23	99.37
c0224A03	1	7	165	201	628	84	233	AC191653	222521	41165	99.44	99.37
b0171I15	1	7	193	235	628	8	139	AC190624	177925	Right end	99.44
c0055G08	1	8	0	38	9	18	135	AC206951	187857	98504		99.57
c0057C05	1	8	22	57	9	81	191	AC213781	187473	60083	99.22	99.5
c0365I14	1	8	47	80	9	141	250	AC211261	191763	95477	98.82	99.1
c0245B10	1	8	64	92	9	194	312	AC209626	185598	42599	99.61	99.84
c0360B16	1	8	85	115	9	280	400	AC194144	179447	6039	96.08	99.6
c0092J03	1	8	111	151	9	388	490	AC177850	187416	58116	99.62	99.74
c0370G07	1	8	130	173	9	448	524	AC191547	99212	66699	99.87	99.51
c0197E07	1	8	143	178	9	472	603	AC191456	187606	23066	99.74	97.51
c0247N08	1	8	172	213	9	578	717	AC209057	187153	74147	98.81	99.37
c0527J11	1	8	192	227	9	675	794	AC204840	172608	34325	99.75	99.61
b0546B07	1	8	230	247	9	749	826	AC204997	117309	49043	99.82	99.18
c0376H17	1	8	242	275	9	793	915	AC208665	205575	46322	99.88	99.88
c0077D05	1	8	269	301	9	885	1006	AC210668	172292	80599	99.15	99.85
b0128F16	1	8	286	307	9	961	1050	AC208357	113826	28903	99.69	99.56
b0392A02	1	8	308	331	9	1005	1085	AC205000	134650	58467	99.6	98.62
c0100M21	1	8	325	367	743	232	354	AC177946	179519	10194	0	0
b0519H07	1	8	363	393	9	1195	1306	AC197760	160699	5429	100	99.87
c0003A01	1	8	394	425	NA	NA	NA	AC191311	245721	11059	0	97.62	AC145726
b0396A23	1	8	426	449	9	1418	1500	AC195679	119815	59602	99.68	99.66
b0543L01	1	8	439	460	NA	NA	NA	AC216858	137068	40568	98.95	98.87
c0135C13	1	8	446	481	9	1488	1622	AC203869	166468	8978	99.56	99.71
b0106O08	1	8	479	511	NA	NA	NA	AC166636	136059	64522	99.49	99.27
c0392F19	1	8	502	525	9	1649	1767	AC213454	172426	31339	99.49	99.78
c0212J16	1	8	522	553	9	1753	1881	AC207874	197513	42315	96.09	99.74
b0589D19	1	8	546	577	9	1842	1961	AC205061	167058	36503	99.01	99.24
c0425E16	1	8	571	598	9	1929	2021	AC213644	152791	36786	99.87	100
c0254L05	1	8	592	616	9	1958	2065	AC207340	181323	65775	0	97.64
c0347I22	1	8	607	638	9	2022	2123	AC208921	182983	0	99.52	99.52
c0464H04	1	8	634	669	9	2106	2234	AC207073	161490	16241	99.73	99.52
c0128C12	1	8	668	705	9	2216	2345	AC177925	219343	13764	98.86	99.28
c0395P16	1	8	707	747	9	2354	2490	AC197481	172549	18619	98.54	100
b0157E15	1	8	747	771	NA	NA	NA	AC232220	112281	16287	99.3	98.83
c0523B09	1	8	765	799	9	2544	2658	AC200038	200785	33504	99.3	99.88
c0320L02	1	8	787	823	9	2613	2712	AC193501	195923	15073	99.03	100
c0120B01	1	8	818	858	9	2695	2840	AC177931	228282	29777	99.76	0
c0232P10	1	8	846	887	9	2810	2936	AC213598	206280	44126	99.76	99.06
c0375O23	1	8	873	918	9	2887	3013	AC218031	170283	31037	99.02	100
c0305F18	1	8	910	938	NA	NA	NA	AC231484	168669	63512	99.24	98.32
c0289B07	1	8	923	956	9	3028	3146	AC200137	184104	11365	97.98	99.51
c0054L09	1	8	958	993	9	3149	3254	AC177837	195496	11372	99.71	97.93
c0529H10	1	8	980	997	9	3220	3349	AC211632	208184	88404	98.06	0
b0238I18	1	8	992	1011	9	3232	3302	AC212204	113264	39834	100	99.63
b0289L16	1	8	1007	1028	9	3272	3360	AC212205	119417	63087	99.87	99.63
c0287H02	1	8	1019	1050	9	3299	3409	AC209846	169171	10344	99.16	99.22
c0472F01	1	8	1042	1075	9	3387	3479	AC205114	191268	0	99.68	99.23
c0292K18	1	8	1064	1103	NA	NA	NA	AC204597	190604	106241	98.75	98.98
b0645G21	1	8	1086	1107	NA	NA	NA	AC195802	107710	4731	99.73	99.67
c0426I13	1	8	1113	1142	9	3588	3682	AC186653	163286	Right end	99.42
c0181D22	1	9	0	33	10	0	162	AC205725	259521	59856		0
c0462P14	1	9	29	65	10	95	222	AC212396	183591	50386	99.62	97.98
c0138L11	1	9	57	89	10	208	322	AC205905	228878	24707	97.91	98.73
c0053C15	1	9	91	132	10	287	451	AC205124	190644	7437	98.54	99.12
c0394L17	1	9	121	147	NA	NA	NA	AC217680	159459	86673	98.62	99.64
c0119F02	1	9	129	167	10	502	646	AC191053	172963	31244	100	98.33
b0248N21	1	9	154	189	NA	NA	NA	AC203969	173012	143331	99.5	99.37
c0017C24	1	9	159	203	10	656	773	AC177902	206267	14854	99.76	99.58
b0139O01	1	9	207	230	10	761	837	AC190567	134436	29824	99.87	99.32
c0117B02	1	9	226	253	NA	NA	NA	AC195387	139208	47922	100	99.85
c0266I01	1	9	252	282	10	853	954	AC200502	160276	80480	98.97	99.33
c0514G22	1	9	266	301	NA	NA	NA	AC194015	170117	10009	100	99.19
c0005M17	1	9	302	341	10	994	1093	AC177841	208091	49664	96.55	99.76
c0012J10	1	9	335	373	10	1076	1180	AC191457	244270	78068	99.74	99.46
b0537N19	1	9	352	383	10	1140	1197	AC197895	116704	0	99.39	0
c0014I23	1	9	370	410	NA	NA	NA	AC231606	220420	49317	0	99.22
c0159B04	1	9	403	439	10	1278	1393	AC211140	171041	34755	96.04	100
c0023H12	1	9	424	471	10	1359	1501	AC209210	196215	38980	99.74	100
c0242M10	1	9	465	505	NA	NA	NA	AC177820	294996	21338	99.75	97.19
c0042H19	1	9	505	546	10	1605	1753	AC194252	198116	57401	100	96.97
c0546E22	1	9	547	574	10	1696	1833	AC207065	157858	32939	99.2	99.58
b0250M18	1	9	564	586	10	1781	1902	AC204547	119638	21432	99.76	100
c0201N06	1	9	588	623	10	1899	1999	AC211701	181387	16317	98.51	98.66
c0209I02	1	9	621	656	10	1957	2090	AC177889	210690	10974	100	99.32
b0491A08	1	9	654	679	10	2075	2161	AC190820	140230	15151	100	99.48
b0271K21	1	9	675	699	10	2146	2247	AC196471	135508	55176	99.34	99.63
c0141M18	1	9	690	724	844	1923	2030	AC208897	190822	65206	97.23	99.63
c0227O15	1	9	697	735	10	2265	2371	AC202990	162891	63219	94.35	98.28
c0287I03	1	9	730	764	10	2325	2412	AC209847	176645	88586	99.64	99.59
c0392G03	1	9	745	779	10	2390	2471	AC197545	185621	21448	98.65	98.09
c0054G22	1	9	773	820	NA	NA	NA	AC177836	209549	2030	98.65	97.98
b0071G08	1	9	816	841	10	2595	2718	AC214658	153354	42092	99.51	100
b0421H08	1	9	829	858	10	2688	2769	AC204928	117186	26548	99.48	98.64
c0476C04	1	9	851	887	10	2713	2857	AC204758	202097	12244	99.75	99.87
c0528G06	1	9	883	925	10	2848	2962	AC204022	191869	100944	0	0
c0426D22	1	9	901	930	10	2964	3063	AC191034	150070	67691	99.49	99.72
b0123F23	1	9	919	948	10	3011	3106	AC203973	141974	81369	99.62	0
c0013D11	1	9	934	973	10	3035	3169	AC177914	220025	170403	98.16	99.49
c0387C07	1	9	941	975	NA	NA	NA	AC198862	184979	48187	98.63	97.41
c0038D13	1	9	971	1001	10	3152	3278	AC190926	180929	28693	99.33	100
c0089G08	1	9	999	1025	NA	NA	NA	AC214822	192172	77822	97.72	97.78
c0191C23	1	9	1021	1046	10	3336	3454	AC212566	173573	39465	100	98.93
c0008D20	1	9	1040	1062	10	3410	3525	AC204599	178766	46500	100	99.49
c0380M20	1	9	1074	1107	10	3502	3637	AC191623	163515	133515	98.51	99.5
c0042E18	1	9	1077	1112	10	3510	3676	AC177832	198408	117856	99.58	96.95
b0289N07	1	9	1086	1116	NA	NA	NA	AC204265	146362	23480	99.65	99.72
c0039N02	1	9	1125	1161	10	3670	3768	AC190934	178748	66507	99.06	100
b0386P01	1	9	1135	1167	10	3823	3898	AC200542	139984	74972	98.7	0
b0596A11	1	9	1162	1190	10	3836	3941	AC197594	155802	10103	94.34	98.96
b0255M04	1	9	1186	1210	NA	NA	NA	AC186009	142996	Right end	100
b0148K19	1	10	0	30	11	1847	1917	AC187834	102990	2343		0
b0624I12	1	10	27	52	11	1774	1846	AC194395	147996	37450	99.54	0
c0236J02	1	10	41	87	11	1699	1809	AC204322	181904	44797	97.67	100
b0437A15	1	10	76	112	11	1649	1734	AC204831	169848	7690	99.76	100
b0394M02	1	10	109	136	NA	NA	NA	AC226312	115169	29967	99.72	100
c0478G13	1	10	134	168	NA	NA	NA	AC217909	176785	28058	97.69	98.98
c0044F17	1	10	163	188	11	1386	1500	AC211945	157774	18698	99.86	99.86
c0438M11	1	10	192	226	11	1269	1390	AC214665	166513	27480	99.76	98.25
c0233P07	1	10	222	258	11	1175	1300	AC202987	201547	84679	99.88	99.63
c0557A14	1	10	250	281	11	1096	1200	AC196789	169874	19691	99.67	99.06
c0049N03	1	10	276	313	11	1017	1120	AC190506	185830	12918	99.42	96.81
c0510O02	1	10	314	338	11	917	1020	AC207072	151744	38085	100	99.66
b0561D09	1	10	359	385	11	852	959	AC209403	140929	80835	99.5	99.85
b0537I07	1	10	372	398	NA	NA	NA	AC217412	146397	42808	99.36	99.7
c0469O16	1	10	387	418	11	737	860	AC208467	178204	75489	99.38	99.72
b0170E05	1	10	410	433	11	703	788	AC203903	130838	77031	98.43	0
c0009H16	1	10	413	449	11	631	756	AC191681	253283	20510	99.35	98.65
c0189E06	1	10	445	485	11	513	649	AC177901	176525	15524	99.43	99.37
b0044N13	1	10	473	505	11	402	523	AC201758	170622	70676	99.86	99.1
c0434N23	1	10	496	532	11	302	457	AC213042	189303	24897	99.87	0
b0243D22	1	10	528	553	11	226	336	AC204544	128505	37698	99.57	99.62
c0227O21	1	10	542	574	NA	NA	NA	AC233859	170037	50742	98.38	98.06
b0156A04	1	10	560	586	11	109	195	AC155390	124666	8383	99.2	99.07
Z_AI-0829G11	1	10	573	591	NA	NA	NA	AC225133	38292	33609	99.73	99.64
c0105M24	1	10	578	608	NA	NA	NA	AC231441	138140	72183	90.81	99.29
c0296K11	1	10	586	620	11	1	117	AC186426	155824	16138	100	100
c0166L03	1	10	618	641	NA	NA	NA	AC186188	141285	7670	99.61	99.22
c0038B24	1	10	638	665	NA	NA	NA	AC210190	181893	46377	99.39	99.31
c0538O19	1	10	658	683	12	137	246	AC194004	175079	7136	98.2	99.63
c0102N13	1	10	697	739	12	227	330	AC177947	182633	98291	97.38	98.58
c0369D06	1	10	703	745	12	277	398	AC193470	169504	70623	97.51	100
c0318I08	1	10	740	782	NA	NA	NA	AC211263	194791	76105	99.58	99.46
c0297O14	1	10	759	802	NA	NA	NA	AC219021	225273	131057	97.55	97.82
c0395G24	1	10	779	812	1090	150	272	AC209933	155505	60529	99.38	99.38
c0130G08	1	10	795	827	1090	214	313	AC211502	165770	37817	99.25	97.4
c0108B11	1	10	815	855	1090	281	392	AC212043	177999	18913	99.48	99.7
b0224H06	1	10	843	862	1090	334	439	AC212203	124405	54038	99.41	99.76
b0389I23	1	10	860	882	1090	412	480	AC212209	151563	28734	0	99.7
c0213M06	1	10	879	923	NA	NA	NA	AC177882	211137	18525	99.07	99.3
b0119J19	1	10	911	932	NA	NA	NA	AC225803	120530	16987	99.84	99.75
b0331F15	1	10	928	961	13	1867	1964	AC214841	146960	17402	99.87	99.59
b0138N01	1	10	960	983	13	1761	1885	AC204697	144037	4833	98.96	99.74
c0292P10	1	10	983	1013	13	1656	1778	AC203988	146289	16447	99.3	98.97
c0418N12	1	10	1008	1036	13	1584	1686	AC202870	159654	47708	99.86	98.94
c0085B05	1	10	1028	1064	13	1538	1627	AC191076	199886	70882	100	100
b0614H07	1	10	1060	1086	13	1443	1527	AC205100	123771	24080	99.73	99.56
c0029E01	1	10	1084	1121	13	1319	1444	AC210665	175570	59543	99.48	99.88
b0574E09	1	10	1105	1132	13	1248	1391	AC204994	130059	64898	99.76	100
b0596I11	1	10	1113	1138	NA	NA	NA	AC229572	123135	20397	99.59	98.76
b0588B07	1	10	1136	1173	13	1092	1203	AC207516	160799	65325	99.49	99.68
c0131J12	1	10	1156	1186	13	1074	1157	AC194966	123530	34046	99.77	98.99
b0342D19	1	10	1178	1202	13	980	1139	AC190759	118522	32820	99.46	99.11
c0111N24	1	10	1191	1231	13	907	1024	AC177941	194218	54817	99.67	99.75
c0196C18	1	10	1217	1253	13	845	973	AC211734	187482	51132	99.54	98.16
c0289G12	1	10	1245	1276	13	779	871	AC214040	195758	12247	97.78	98.12
c0537D21	1	10	1276	1304	13	697	804	AC206846	151723	68135	99.74	99.87
c0149E11	1	10	1294	1333	NA	NA	NA	AC214368	199988	9426	98.5	98.22
c0151I15	1	10	1327	1364	NA	NA	NA	AC231547	172510	96130	98.48	97.44
c0170O09	1	10	1350	1380	13	458	585	AC209675	191848	75955	99.87	98.45
c0131F12	1	10	1380	1413	13	384	531	AC203951	178920	103357	99.23	97.91
c0432D07	1	10	1403	1431	NA	NA	NA	AC217351	182207	57360	99.74	99.05
c0384F14	1	10	1426	1458	13	293	392	AC205052	202026	37304	0	98.11
c0375C13	1	10	1458	1501	13	185	328	AC177858	219022	155159	97.86	99.87
c0107K02	1	10	1465	1510	NA	NA	NA	AC209424	198269	19982	98.4	98.99
b0333N05	1	10	1508	1530	NA	NA	NA	AC205881	144898	100802	98.03	98.03
b0632E22	1	10	1511	1531	13	84	195	AC189740	149928	106648	99.12	99.12
c0427A19	1	10	1512	1544	NA	NA	NA	AC219145	146359	6241	99.88	98.38
c0261A24	1	10	1537	1567	NA	NA	NA	AC215240	138392	48396	99.15	94.22
c0261C23	1	10	1564	1589	NA	NA	NA	AC208428	140895	51471	99.36	99.77
c0128M10	1	10	1586	1612	NA	NA	NA	AC226346	174824	12669	99.08	99.45
c0548B14	1	10	1600	1623	NA	NA	NA	AC212193	136294	66734	99.87	99.87
b0537O13	1	10	1609	1623	NA	NA	NA	AC219017	82143	2753	99.77	99.86
b0189G18	1	10	1616	1637	14	0	77	AC196474	108403	53719	99.55	100
c0090M09	1	10	1664	1702	14	41	147	AC191091	183041	32516	99.87	99.85
c0403A04	1	10	1696	1728	14	131	249	AC197542	176539	44476	100	100
c0295D18	1	10	1719	1755	NA	NA	NA	AC209462	177390	53658	99.51	94.49
c0527O01	1	10	1754	1788	14	267	385	AC205244	198690	54761	99.88	100
c0274L13	1	10	1770	1810	NA	NA	NA	AC217897	201921	83096	99.86	97.96
c0214I05	1	10	1792	1824	14	382	528	AC208204	188477	67913	98.21	97.54
c0104B23	1	10	1808	1842	NA	NA	NA	AC219047	170850	35702	98.59	99.87
b0372D12	1	10	1832	1860	14	546	683	AC204035	162662	15964	99.68	100
c0114N02	1	10	1871	1904	14	628	731	AC191592	181283	76411	99.39	100	AC155523
b0377G04	1	10	1893	1920	NA	NA	NA	AC208799	143793	85007	99.73	100
c0526O03	1	10	1898	1946	14	703	797	AC208040	163008	48919	96.78	98.55
c0069K04	1	10	1941	1966	14	830	921	AC212129	161426	17905	99.39	99.3
c0115H21	1	10	1960	1999	14	917	1051	AC203887	182245	21019	98.95	97.22
c0294F02	1	10	1995	2032	14	995	1153	AC203927	177894	40311	98.81	98
b0434D02	1	10	2023	2056	14	1135	1221	AC185597	164520	4274	99.79	99.69
b0519G14	1	10	2052	2068	14	1195	1278	AC212116	126686	19854	98.51	99.87
c0521O11	1	10	2063	2132	14	1253	1380	AC211908	181754	92903	100	95.1
c0544P21	1	10	2127	2159	14	1323	1419	AC205541	165485	57594	99.76	99.74
c0287J07	1	10	2145	2182	NA	NA	NA	AC197353	199197	14982	0	99.77
c0010M04	1	10	2176	2224	NA	NA	NA	AC192384	196649	28889	97.69	99.49
c0528K09	1	10	2217	2243	14	1621	1749	AC202895	167928	26039	99.7	100
b0431O07	1	10	2252	2276	NA	NA	NA	AC233932	119843	104215	0	97.34
b0185D22	1	10	2255	2284	14	1741	1852	AC210049	144898	66940	95.65	99.69
b0119M07	1	10	2262	2294	NA	NA	NA	AC232294	123787	No cmp	99.33	No next cmp
b0404C20	1	10	2271	2293	NA	NA	NA	#N/A	#N/A	No cmp	0	0
b0470H16	1	10	2288	2312	NA	NA	NA	AC233935	151652	59831	No pre cmp	0
b0495N19	1	10	2307	2327	NA	NA	NA	AC232211	138086	9935	100	0
c0333E23	1	10	2307	2340	77	185	316	AC213668	145210	21802	99.72	99.85
c0011I14	1	10	2339	2377	77	71	210	AC216589	210630	21913	99.73	98.77
b0296P24	1	10	2377	2403	77	33	115	AC208471	125687	10660	99.07	99.59
c0052E13	1	10	2398	2432	15	985	1109	AC216255	270992	53124	99.25	98.48
b0331H10	1	10	2416	2439	NA	NA	NA	AC226534	105058	21546	98.88	99.22
c0474A17	1	10	2448	2486	15	1098	1247	AC208854	203550	75176	98.59	97.59
c0463M16	1	10	2475	2507	15	1198	1312	AC214667	192098	21346	99.74	98.93
c0297N05	1	10	2495	2523	15	1291	1390	AC205686	166184	57879	99.19	98.64
b0129G22	1	10	2512	2539	15	1341	1446	AC185616	148611	21316	100	100
c0264L18	1	10	2550	2591	15	1430	1555	AC207262	177769	17727	95.55	97.33
c0410E21	1	10	2582	2609	15	1524	1639	AC214111	187750	48150	97.36	99.87
c0236F19	1	10	2597	2626	NA	NA	NA	AC226231	159307	36181	99.2	99.21
b0195G24	1	10	2610	2632	15	1693	1787	AC202101	136147	31461	99.71	99.73
c0189O12	1	10	2646	2683	15	1773	1878	AC194403	201214	38482	98.73	99.72
c0152F12	1	10	2672	2711	15	1852	1965	AC186336	203243	18949	99.33	99.61
b0627D20	1	10	2707	2735	15	1938	2041	AC197473	132647	42426	98.84	98.34
c0046A19	1	10	2721	2757	15	1999	2130	AC202537	167235	58506	100	99.31
b0302L08	1	10	2738	2766	NA	NA	NA	AC217300	140139	23819	99.88	100
c0117B15	1	10	2757	2794	15	2168	2303	AC202041	192111	52973	99.22	99.48
c0455E22	1	10	2789	2826	15	2262	2378	AC195310	233780	25792	99.29	99.31
c0455A06	1	10	2835	2867	15	2380	2491	AC186651	173450	49361	100	99.73
b0340C10	1	10	2869	2899	NA	NA	NA	AC195881	166740	22443	100	99.22
c0403A03	1	10	2903	2929	NA	NA	NA	AC204421	114412	12512	98.69	99.55
c0280C14	1	10	2923	2952	15	2624	2719	AC208219	173660	41530	100	99.86
b0435E05	1	10	2965	2993	15	2694	2796	AC197071	149364	36960	100	0
c0266M24	1	10	2986	3029	15	2782	2880	AC186308	202530	63783	0	0
b0397H06	1	10	3014	3041	15	2853	2934	AC207378	137794	54154	97.91	0
c0378I14	1	10	3034	3065	15	2903	3020	AC213659	184817	29980	93.87	99.88
c0315D23	1	10	3081	3114	15	2981	3104	AC212219	175227	60344	97.5	94.69
c0273C12	1	10	3109	3137	15	3051	3158	AC208436	144162	10380	99.77	100
b0158A07	1	10	3142	3178	15	3117	3228	AC185512	192785	67893	99.82	99.38
c0173I11	1	10	3161	3199	15	3228	3354	AC208201	181208	20560	97.62	98.67
b0334G06	1	10	3193	3220	15	3312	3412	AC208569	117404	43571	99.87	100
c0474J04	1	10	3215	3244	15	3444	3536	AC204397	140853	43003	100	100
c0472K14	1	10	3267	3306	NA	NA	NA	AC196161	199619	20338	99.12	99.84
c0262C05	1	10	3301	3331	NA	NA	NA	AC186621	197695	80559	99.4	100
c0215N19	1	10	3333	3362	15	3652	3764	AC193961	181951	11731	98.53	100
c0157G02	1	10	3348	3384	15	3749	3871	AC200260	172348	38711	95.18	99.6
c0202E13	1	10	3384	3427	15	3846	3987	AC208623	203584	17351	97.38	95.93
b0385K15	1	10	3429	3451	15	3983	4064	AC205003	123711	10344	99.86	97.18
b0366G20	1	10	3450	3465	NA	NA	NA	AC217383	109843	68191	98.09	99.76
c0014D03	1	10	3477	3509	15	0	126	AC199941	215377	39303	98.69	99.62
c0175A14	1	10	3499	3534	15	86	208	AC206208	175680	60072	98.85	98.77
c0438M13	1	10	3515	3548	15	170	261	AC215496	165498	12677	100	98.53
c0076G09	1	10	3549	3570	15	245	324	AC208222	118915	42768	99.35	100
b0286H14	1	10	3565	3593	15	300	395	AC215303	142543	41535	98.25	99.85
c0118H21	1	10	3579	3617	15	346	460	AC203883	162898	11397	99.19	99.06
c0548B17	1	10	3619	3660	NA	NA	NA	AC202090	190420	73419	99.49	99.87
c0113A18	1	10	3641	3681	15	531	674	AC194975	202998	24531	99.55	99.59
c0149M05	1	10	3679	3710	15	624	729	AC204434	140115	44953	99.63	99.22
c0112J07	1	10	3692	3737	15	677	812	AC209853	210319	25026	99.64	92.16
c0529E03	1	10	3726	3767	15	777	875	AC210835	156769	38329	99.21	99.4
b0443C01	1	10	3759	3783	15	860	940	AC185596	197346	Right end	99.84
b0579L08	1	12	0	27	NA	NA	NA	AC191517	121944	10907		100
c0460F16	1	12	31	66	631	1474	1562	AC196711	157033	29871	99.23	98.96
c0547A12	1	12	60	91	631	1370	1497	AC201745	178703	10404	99.74	97.92
c0241N03	1	12	88	122	631	1263	1372	AC214130	194511	79678	99.55	99.33
b0386J14	1	12	104	130	NA	NA	NA	AC219108	112521	16330	99.77	99.26
c0182I22	1	12	113	157	631	1148	1267	AC213870	178823	127219	98.9	99.54
b0160L21	1	12	130	152	631	1153	1237	AC208231	127754	23265	100	100
c0319A09	1	12	152	192	631	1068	1179	AC194197	182358	114564	97.81	100
c0108J16	1	12	169	214	631	979	1101	AC177940	201779	21521	98.61	99.86
c0021B24	1	12	208	238	631	916	1011	AC191659	159785	66974	99.42	99.42
c0395M04	1	12	231	257	NA	NA	NA	AC198770	171625	82493	99.14	99.36
c0544M05	1	12	244	278	NA	NA	NA	AC202159	168354	13024	99.46	0
b0326L18	1	12	279	309	631	727	854	AC211519	122420	0	99.23	0
c0540M05	1	12	305	320	NA	NA	NA	AC225345	163016	172288	99.65	98.78
c0126P20	1	12	317	356	631	600	704	AC194462	178433	9077	99.62	99.7
b0361G06	1	12	361	382	631	514	625	AC213853	152811	6272	100	99.85
b0331D24	1	12	383	412	631	435	524	AC211646	144616	33355	99.56	99.38
c0451O21	1	12	410	440	631	339	467	AC199551	180107	17473	99.52	98.99
c0142J10	1	12	435	462	631	261	358	AC192383	139995	48035	99.62	100
c0180G08	1	12	454	485	631	200	294	AC186298	177730	5933	99.72	99.6
c0288J04	1	12	489	529	631	126	210	AC199773	154116	62659	100	99.01
b0341P15	1	12	520	539	631	0	149	AC208571	114423	19095	100	99.75
b0377A01	1	12	544	572	NA	NA	NA	AC208700	127429	34589	99.52	99.51
c0011P05	1	12	551	590	NA	NA	NA	AC219029	195563	79623	99.64	99.73
c0388P09	1	12	567	603	16	770	876	AC207659	165100	25177	99.74	99.66
c0399C20	1	12	593	630	16	641	804	AC214977	202377	59249	0	99.35
c0053K13	1	12	623	653	16	590	698	AC194260	171141	19680	95.1	97.96
c0066J20	1	12	675	699	16	516	608	AC200560	158919	13232	99.55	99.87
b0165O04	1	12	693	723	16	444	530	AC213876	134938	31655	99.76	99.86
c0003J06	1	12	718	729	NA	NA	NA	AC231749	227553	177693	98.9	99.6
c0411G09	1	12	724	764	16	347	477	AC214109	192487	17238	98.75	99.83
c0321M23	1	12	761	793	16	245	369	AC204578	181780	67869	96.37	98.19
b0386I12	1	12	782	806	16	174	263	AC185601	153649	37734	99.83	0
b0456F14	1	12	818	835	16	105	183	AC204929	132167	100843	0	99.58
b0109M14	1	12	823	849	16	68	160	AC208356	138488	14338	99.57	97.47
b0312H20	1	12	846	872	NA	NA	NA	AC185607	135933	Right end	100
c0408F23	1	13	0	29	17	339	422	AC186655	191971	7529		99.64
b0538A20	1	13	24	44	17	268	339	AC194361	108205	63087	99.7	100
b0229E16	1	13	40	61	17	210	305	AC191411	171853	126148	99.44	100
c0316H05	1	13	57	97	17	136	259	AC177855	200476	20165	98.92	100
c0132H17	1	13	90	127	NA	NA	NA	AC191585	197882	55581	99.74	100
b0130F12	1	13	117	145	NA	NA	NA	AC185613	131349	Right end	98.77
c0546O09	1	14	0	40	52	46	191	AC186680	172687	11727		99.53
c0279L08	1	14	29	61	NA	NA	NA	AC208339	171841	34324	99.34	99.64
b0334K23	1	14	59	79	52	331	407	AC208697	119875	26011	99.71	100
c0392J12	1	14	85	116	52	384	494	AC201775	171710	26113	99.74	98.9
c0140L13	1	14	110	152	52	439	582	AC194453	192049	35984	0	97.43
c0160E24	1	14	147	179	52	558	670	AC186229	172325	30713	98.52	97.78
b0108A22	1	14	169	190	NA	NA	NA	AC226608	103793	30287	99.6	99.55
b0043J17	1	14	188	215	18	2128	2207	AC204689	142145	57916	99.72	99.05
c0065H02	1	14	203	242	18	2039	2157	AC209839	190129	51661	100	0
b0608A18	1	14	222	251	18	1940	2047	AC204932	158218	97797	0	99.62
c0517A03	1	14	245	270	NA	NA	NA	AC231739	174388	58107	99.64	99.89
b0581I14	1	14	259	295	18	1842	1957	AC204931	185694	22354	100	99.33
c0353L08	1	14	283	315	18	1759	1868	AC211742	175718	43557	100	100
c0308I19	1	14	309	345	18	1662	1793	AC205101	184145	37556	98.07	99.58
c0251D05	1	14	339	377	NA	NA	NA	AC209460	191002	93666	97.99	98.81
c0040G11	1	14	357	397	18	1498	1633	AC190947	188809	45245	99.88	0
b0288F12	1	14	387	419	18	1418	1543	AC212400	156415	55092	No BES
c0548F14	1	14	406	438	18	1381	1477	AC211001	152563	22386	99.38	99.66
b0379C16	1	14	435	458	NA	NA	NA	AC216806	129378	60363	99.28	99.21
c0026I07	1	14	441	482	18	1242	1361	AC205071	177142	63526	98.54	98.79
c0296E23	1	14	467	510	18	1157	1288	AC206252	167150	52167	99.49	97.54
c0463L07	1	14	505	525	NA	NA	NA	AC219075	164650	64255	99.67	99.3
b0276O12	1	14	529	561	NA	NA	NA	AC225978	125680	40587	99.2	98.68
c0284J12	1	14	551	583	18	969	1079	AC210262	178811	79421	97.96	97.2
c0098P12	1	14	566	602	NA	NA	NA	AC218984	158198	39474	99.76	99.75
b0374D16	1	14	584	617	18	847	1003	AC204691	129623	10957	99.01	99.18
c0301B12	1	14	635	678	18	775	913	AC209440	206241	51290	99.46	97.63
c0030G08	1	14	667	695	18	711	817	AC194267	176690	15668	99.88	98.98
c0255E12	1	14	686	723	18	621	721	AC187873	201532	86113	100	0
b0353A06	1	14	715	738	NA	NA	NA	AC194314	161864	34711	99.71	98.66
c0064M23	1	14	742	777	18	476	600	AC204306	178147	38890	96.19	99.72
b0212J12	1	14	766	791	18	380	482	AC204541	148636	18833	100	99.58
c0400B17	1	14	789	819	18	159	295	AC215638	196506	44148	98.42	0
c0189F02	1	14	808	852	18	85	200	AC205149	167343	75505	99.48	100
c0116G19	1	14	838	870	18	20	134	AC200216	183291	7094	99.29	99.84
b0614P24	1	14	875	892	698	60	139	AC206840	132386	24371	100	100
c0256I18	1	14	893	935	698	126	244	AC205565	199590	44875	98.22	95.74
c0340E04	1	14	927	958	698	229	308	AC214145	185821	16690	97.69	96.55
c0052H10	1	14	952	978	698	288	419	AC214794	168134	38723	99.78	100
c0343E07	1	14	973	996	NA	NA	NA	AC207556	93756	2587	100	99.5
c0099J07	1	14	997	1036	698	445	562	AC193419	210699	59082	98.5	99.73
c0195L05	1	14	1033	1069	NA	NA	NA	AC209684	185800	7114	96.04	98.98
Z_AI-0837K16	1	14	1046	1065	NA	NA	NA	AC219179	37755	27512	98.56	99.86
c0273M08	1	14	1060	1096	698	637	759	AC205669	194132	29035	99.76	98.8
c0009E11	1	14	1095	1124	698	748	868	AC209438	203143	44327	100	99.64
c0262J07	1	14	1119	1159	698	831	954	AC194213	174932	19261	98.27	97.82
c0285D14	1	14	1144	1193	698	943	1067	AC186285	179684	143979	99.61	100
c0276H07	1	14	1160	1204	698	964	1073	AC199770	170112	98659	100	100
c0478L13	1	14	1184	1223	698	1013	1126	AC193424	163473	63830	98.5	99.75
c0287D08	1	14	1223	1251	NA	NA	NA	AC199922	155120	42095	100	100
c0465G20	1	14	1258	1286	698	1121	1284	AC205888	175867	29243	98.64	99.24
b0268O11	1	14	1282	1301	698	1233	1346	AC204548	130094	67989	98.95	100
c0083O09	1	14	1291	1321	698	1300	1460	AC205502	196958	32347	100	99.13
c0029C17	1	14	1315	1347	NA	NA	NA	AC226222	165555	9518	98.6	99
c0401J06	1	14	1354	1378	698	1533	1668	AC205704	162127	26575	99.22	100
b0571F07	1	14	1378	1403	698	1660	1743	AC206972	131068	69601	99.87	99.86
c0018A04	1	14	1415	1426	19	2642	2750	AC216278	189166	22224	97.71	97.82
b0318A16	1	14	1421	1443	19	2610	2687	AC202149	142075	74552	98.93	99.83
c0168F13	1	14	1434	1475	19	2513	2642	AC197371	207120	5449	99.36	0
c0545G15	1	14	1470	1500	19	2420	2543	AC186600	168682	11607	100	99.87
c0162E18	1	14	1527	1551	19	2318	2446	AC195378	160173	13431	99.8	99.62
c0182I04	1	14	1556	1598	19	2197	2341	AC214532	213839	6074	97.89	97.93
c0099G20	1	14	1593	1625	19	2065	2207	AC205493	178221	46761	99.39	99.75
b0166G15	1	14	1622	1644	19	1998	2105	AC199053	172325	32694	99.67	99.7
b0096K09	1	14	1637	1667	19	1918	2050	AC193328	136830	92633	99.75	99.23
c0498K03	1	14	1651	1685	19	1881	1990	AC209259	181629	21665	98.6	99.6
b0606C13	1	14	1678	1703	19	1850	1925	AC206850	129968	88307	96.21	99.72
c0116M01	1	14	1681	1716	19	1754	1866	AC205528	194212	32289	99.12	100
b0247L21	1	14	1712	1733	19	1681	1778	AC204545	129283	19218	100	99.27
b0109O02	1	14	1731	1756	19	1614	1701	AC204530	115912	38238	99.51	100
b0532F19	1	14	1751	1777	19	1519	1638	AC204681	147313	24904	99.87	99.86
b0285P01	1	14	1778	1802	19	1461	1569	AC204549	130303	41804	99.86	99.87
b0288O09	1	14	1795	1820	19	1425	1499	AC203026	107611	23032	0	98.85
c0455E13	1	14	1816	1857	NA	NA	NA	AC191026	166740	48753	100	100
b0146M05	1	14	1844	1862	NA	NA	NA	AC204380	132429	112304	99.25	97.87
c0070I13	1	14	1854	1879	NA	NA	NA	AC216849	167019	26743	99.72	99.4
b0454L21	1	14	1871	1896	19	1238	1316	AC204659	115563	36333	100	100
c0305N07	1	14	1888	1924	19	1163	1271	AC205494	168524	47225	99.38	98.35
c0384I23	1	14	1916	1948	19	1065	1148	AC208459	168949	30598	99.59	99.54
c0119A14	1	14	1947	1965	19	1035	1107	AC202452	107719	9650	99.46	99.75
b0189I20	1	14	1965	2001	19	938	1065	AC187204	150987	953	99.15	99.76
c0188M09	1	14	2000	2022	19	839	945	AC213099	148332	3379	98.52	0
c0236L23	1	14	2020	2055	NA	NA	NA	AC226368	137884	111769	99.14	99.31
c0366F19	1	14	2033	2073	19	698	826	AC206299	215492	38098	99.56	98.22
b0508B15	1	14	2064	2089	19	593	705	AC195840	167414	29095	99.85	99.03
c0256K18	1	14	2091	2125	19	505	602	AC186521	179370	48795	99.72	99.69
c0270L19	1	14	2118	2145	NA	NA	NA	AC216247	173469	30163	0	96.41
b0493M01	1	14	2148	2166	19	343	410	AC208576	97962	0	100	100
c0146H13	1	14	2166	2202	NA	NA	NA	AC216188	217074	9160	96.56	100
c0112J19	1	14	2200	2242	19	118	243	AC197387	199497	6497	97.21	99.16
c0240M10	1	14	2241	2279	NA	NA	NA	AC186523	186530	46637	99.56	100
b0158B19	1	14	2268	2299	21	262	353	AC194910	126831	20170	99.45	99.01
c0140C17	1	14	2292	2332	21	147	281	AC203431	172282	38686	99.75	99.11
c0113G22	1	14	2319	2354	NA	NA	NA	AC217443	183564	91348	99.54	98.44
c0104M01	1	14	2335	2370	NA	NA	NA	AC186342	184777	35161	100	98.94
c0164F18	1	14	2366	2389	1123	0	99	AC208200	142542	82611	99.23	99.33
b0465M08	1	14	2390	2415	NA	NA	NA	AC184119	163386	51288	100	98.94
c0286F10	1	14	2406	2435	1123	113	206	AC191317	190013	32220	97.68	0
b0519D21	1	14	2440	2460	829	366	473	AC183929	167949	38442	99.78	99.86
b0476H08	1	14	2458	2490	829	310	417	AC195850	153741	74346	99.48	97.7
c0268F02	1	14	2469	2501	NA	NA	NA	AC225814	128696	28231	99.54	99.8
c0470D10	1	14	2495	2534	829	182	307	AC213043	186080	39694	99.74	99.37
b0129K09	1	14	2538	2560	829	82	231	AC193979	131471	10819	98.84	100
b0167A20	1	14	2562	2589	829	20	106	AC187800	139042	Right end	99.86
b0170L06	1	15	0	30	1059	175	255	AC185412	140617	10376		99.61
c0231C08	1	15	23	66	1059	73	203	AC177818	170992	33801	98.95	99.36
b0568F18	1	15	69	93	1059	44	123	AC190707	135125	73886	98.8	99.86
b0071J22	1	15	74	102	NA	NA	NA	AC207382	122631	0	100	93.9
b0410I01	1	15	102	143	NA	NA	NA	AC183930	153748	51504	0	99.51
b0130P05	1	15	130	161	1043	68	178	AC195966	154320	42035	97.79	99.54
c0317D20	1	15	152	184	1043	7	112	AC191101	175317	Right end	99.87
b0142D24	1	16	0	17	20	0	107	AC190568	151820	92465		99.72
c0032G14	1	16	13	43	20	45	203	AC204615	192588	20429	99.21	99.66
c0127A20	1	16	37	66	20	182	270	AC205676	178908	35046	99.53	98.41
b0471D20	1	16	63	86	20	240	329	AC204669	132092	43928	99.88	100
c0027O18	1	16	78	102	20	298	410	AC206679	160212	51819	99.49	99.49
c0214H01	1	16	101	126	20	374	454	AC210313	160984	77025	99.22	99.75
c0197B22	1	16	124	155	20	403	510	AC213048	193918	106373	97.55	0
c0063J17	1	16	134	171	20	445	557	AC191011	197360	73259	96.81	99.88
c0039J20	1	16	159	185	NA	NA	NA	AC201802	184443	58736	96.6	96.36
c0473C22	1	16	191	219	20	607	717	AC205700	184581	55662	98.97	99.2
c0131O06	1	16	216	247	20	697	799	AC208894	165852	40333	100	100
c0064A09	1	16	239	276	20	752	884	AC206675	165396	29986	100	99.29
c0188F18	1	16	270	301	20	853	969	AC205278	159303	27940	94.43	99.71
c0476H03	1	16	292	333	20	917	1011	AC186508	172471	45250	99.86	99.86
c0336F04	1	16	321	340	NA	NA	NA	AC217660	95252	15589	98.02	99.2
c0144K03	1	16	332	367	20	1033	1160	AC212291	189697	120435	0	99.03
c0341B19	1	16	358	391	NA	NA	NA	AC188399	182721	Right end	99.75
b0397D04	1	17	4	31	743	811	915	AC185599	125753	43137		100
c0495B21	1	17	25	46	743	677	811	AC211903	185893	103142	99.29	99.68
c0244I14	1	17	41	69	743	639	766	AC215870	163575	20593	99.23	98.19
c0311L16	1	17	66	92	743	558	686	AC213435	151270	45538	98.82	99.46
c0035E07	1	17	91	125	743	485	617	AC206824	185094	37394	100	99.04
c0436D12	1	17	118	154	743	392	530	AC195213	209753	79814	98.46	97.28
c0183N13	1	17	137	170	743	327	459	AC190776	205214	23213	100	97.79
c0044I19	1	17	162	200	NA	NA	NA	AC225355	196327	5463	99.01	97.7
b0638H11	1	17	194	226	743	128	291	AC190903	132210	57055	98.54	99.21
c0263A08	1	17	211	244	743	8	129	AC209328	172816	12751	97.88	97.98
c0450J20	1	17	235	265	NA	NA	NA	AC217302	160034	90100	99.06	0
c0488H16	1	17	260	280	1049	641	723	AC206899	110845	25175	98.38	98.89
b0166L18	1	17	271	294	NA	NA	NA	AC219088	105297	65468	99.34	99.12
c0082K23	1	17	283	324	1049	543	643	AC214506	185042	28941	100	99.86
b0352K24	1	17	314	335	1049	462	562	AC204538	112626	37298	100	99.87
b0519D15	1	17	333	360	1049	406	510	AC194359	154927	42574	99.01	99.75
c0123P18	1	17	348	391	1049	308	438	AC200625	168529	6977	99.21	98.04
c0147I07	1	17	384	423	1049	216	344	AC209721	168163	57995	99.73	98.24
c0039D16	1	17	409	449	1049	149	285	AC196716	172727	37188	99.04	99.6
c0135A18	1	17	444	477	1049	0	119	AC189037	160619	Right end	0
b0590K12	1	18	0	23	589	0	116	AC213871	100295	33318		100
b0230D11	1	18	12	48	589	109	232	AC216723	189160	18526	93.4	99.26
b0473D11	1	18	37	74	589	186	298	AC210719	154562	36658	99.73	99.88
c0040G18	1	18	88	116	589	287	376	AC209841	162527	87428	99.61	98.66
c0327G12	1	18	109	136	589	355	448	AC211404	149292	13021	0	99.21
c0011M15	1	18	137	182	589	419	549	AC191589	227239	9748	97.89	99.13
c0155K09	1	18	185	222	589	542	650	AC177908	176335	32019	99.75	97.23
c0417A10	1	18	217	243	589	634	786	AC191546	198297	25028	99.22	99.24
c0208E04	1	18	235	245	NA	NA	NA	AC231618	122773	30207	97.29	99.34
c0264B06	1	18	240	287	589	797	922	AC212231	186826	103847	98.31	99.62
b0588H07	1	18	282	325	589	848	966	AC195134	169887	9468	99.84	100
c0229F06	1	18	321	360	589	958	1058	AC186627	191223	21048	98.27	97.5
c0080G04	1	18	375	415	589	1025	1158	AC197910	201644	47327	100	99.89
c0134L20	1	18	402	442	NA	NA	NA	AC206517	185380	42896	96.28	98.48
c0132K20	1	18	443	479	589	1199	1339	AC214120	174563	16583	99.39	99.05
c0121K06	1	18	477	507	NA	NA	NA	AC199822	176963	101215	95.2	99.62
c0537M05	1	18	484	518	589	1320	1433	AC190919	160287	27262	97.73	99.74
c0310B22	1	18	515	543	NA	NA	NA	AC217938	152301	54074	99.63	99.33
b0400N15	1	18	546	568	NA	NA	NA	AC217311	136816	41322	100	99.87
c0148G22	1	18	560	593	NA	NA	NA	AC217442	183646	33754	98.8	99.86
b0276A10	1	18	588	624	589	1635	1738	AC195913	180822	28880	99.15	99.5
c0544G12	1	18	617	650	589	1722	1842	AC186599	158416	Right end	99.87
c0507F10	1	19	2	51	748	0	109	AC208123	191582	15783		99.11
c0248I12	1	19	45	83	22	931	1071	AC203845	177090	27340	100	99.63
c0257M02	1	19	73	111	NA	NA	NA	AC200879	180045	52884	100	99.45
c0499A12	1	19	97	136	NA	NA	NA	AC197028	205554	80897	99.64	99.85
c0197E06	1	19	128	158	22	666	785	AC216276	192600	38606	99.87	100
c0230J20	1	19	145	188	22	560	707	AC206196	198007	26221	100	99.51
b0183I13	1	19	185	210	NA	NA	NA	AC217651	165502	113308	99.68	99.69
c0088I21	1	19	194	219	22	448	569	AC205499	184327	4004	99.75	99.74
c0380A18	1	19	219	253	NA	NA	NA	AC233873	142800	120266	99.52	99.7
c0049A02	1	19	224	262	22	310	435	AC216271	228459	81675	99.87	99.87
b0582B05	1	19	252	280	22	237	346	AC211654	183124	18829	99.68	99.68
c0324J17	1	19	286	322	22	123	255	AC205667	182169	26410	99.77	99.75
c0310B07	1	19	313	341	22	33	152	AC205666	164609	84536	99.19	99.45
c0214D20	1	19	320	350	NA	NA	NA	AC217113	159585	12489	99.55	99.1
c0327L14	1	19	345	371	23	537	627	AC202434	152885	1579	99.38	99.64
c0344J08	1	19	373	404	23	401	535	AC194162	133388	12295	98.41	99.87
c0117B10	1	19	402	441	23	318	441	AC177935	200126	149909	97.93	97.93
c0425C14	1	19	402	441	23	320	449	AC205609	185116	47702	98.98	98.98
b0465G01	1	19	420	451	NA	NA	NA	AC194727	134638	30290	0	99.72
b0286H01	1	19	447	475	23	216	324	AC190695	150009	33248	99.73	99.87
c0252D05	1	19	470	500	23	142	243	AC194843	175802	78150	0	98.47
c0489D03	1	19	497	527	23	39	192	AC206326	174256	27531	99.86	98.4
c0143B13	1	19	519	545	NA	NA	NA	AC217124	109414	3803	99.6	99.26
c0004O11	1	19	539	566	NA	NA	NA	AC205416	165635	12067	99.29	99.87
c0021F03	1	19	560	595	NA	NA	NA	AC198289	174204	48883	99.13	99.6
b0478L11	1	19	587	619	693	1005	1099	AC186741	148188	96736	99.7	100
c0280D13	1	19	616	647	693	930	1074	AC199081	160964	47264	99.27	99.17
c0399M17	1	19	640	675	693	899	1009	AC214524	159705	18551	97.68	98.94
c0530J05	1	19	672	707	693	779	903	AC208676	200852	18293	99.43	94.73
c0245M05	1	19	704	731	693	677	787	AC205566	150039	38271	99.87	99.88
c0479P20	1	19	724	758	693	609	725	AC199541	193510	23230	98.51	98.51
c0401D23	1	19	759	779	688	182	311	AC213368	147467	43966	99.44	99.74
c0527N18	1	19	759	795	693	456	560	AC186601	229909	51942	99.84	99.72
b0114C12	1	19	761	781	693	510	616	AC193990	151371	0	99.85	0
b0444N08	1	19	812	840	693	363	460	AC193510	164432	73823	0	99.73
c0326F23	1	19	827	861	693	278	414	AC200055	169175	10140	99.73	99.32
b0314P12	1	19	859	877	NA	NA	NA	AC229990	114712	60991	99.49	97.61
c0338F23	1	19	860	903	693	138	259	AC211994	203839	18931	99.29	98.78
b0443B22	1	19	903	929	693	65	156	AC203968	135634	27370	97.81	97.09
b0230J04	1	19	925	945	693	4	94	AC187481	204507	Right end	99.85
c0105C11	1	20	6	46	24	1209	1333	AC196188	165475	117226		99.86
c0070N20	1	20	14	55	24	1210	1280	AC209829	152185	22072	99.43	99.74
c0465N06	1	20	48	83	24	1073	1220	AC204280	180199	107332	99.66	99.75
c0174A04	1	20	68	111	24	1023	1165	AC210274	169093	51543	98.17	99.85
c0204B08	1	20	92	124	24	959	1076	AC205674	177213	42774	100	99.75
b0614P06	1	20	119	148	24	901	1000	AC194389	151737	38296	100	99.84
c0040O08	1	20	132	171	24	805	950	AC214497	208047	44880	98.73	98.21
c0120E14	1	20	161	192	24	744	871	AC211513	187877	45143	99.35	98.87
c0142F22	1	20	194	219	24	681	808	AC207354	153456	79391	99.34	96.98
c0074I23	1	20	205	239	24	569	704	AC191046	167673	14174	98.67	100
c0400I15	1	20	231	260	24	462	607	AC207320	176928	51292	97.76	96.62
c0292D10	1	20	264	294	24	354	500	AC216245	204230	7052	0	98.66
c0126G21	1	20	297	316	24	273	366	AC212979	164452	97201	99.54	99.74
b0644L08	1	20	301	331	24	191	334	AC204823	217488	22783	97.8	99.73
c0475H18	1	20	332	364	24	73	230	AC205683	175747	55950	99.72	98.58
b0185M19	1	20	365	386	24	33	132	AC185491	118509	37210	100	99.33
c0054L20	1	20	385	407	25	2206	2272	AC203991	171457	27940	0	0
b0289J22	1	20	404	427	NA	NA	NA	AC229575	144779	100083	99.34	99.88
c0084E01	1	20	422	439	NA	NA	NA	AC225334	179469	76617	97.39	99.24
b0267C20	1	20	434	465	25	2020	2149	AC208984	169463	44714	99.73	99.76
c0250K13	1	20	450	484	25	1949	2058	AC205567	173321	39057	98.54	99.62
b0296D08	1	20	472	510	25	1867	1997	AC208566	151419	12842	100	100
c0135H22	1	20	513	549	25	1761	1924	AC208611	175403	63502	99.59	96.63
c0157M22	1	20	533	561	NA	NA	NA	AC226242	165075	72151	99.85	98.55
b0553J21	1	20	547	572	NA	NA	NA	AC200281	158824	143409	97.25	98.13
c0151G13	1	20	550	605	NA	NA	NA	AC189783	187886	2466	98.5	97.84
c0122B13	1	20	568	604	25	1565	1685	AC191042	162268	39974	99.33	99.13
c0074E03	1	20	591	629	25	1469	1604	AC177845	190340	7889	99.11	99.37
c0131O16	1	20	625	660	25	1399	1475	AC190977	152669	19338	98.9	99.86
c0429A10	1	20	656	688	25	1289	1415	AC208461	179736	43867	99.05	97.15
c0223J01	1	20	679	708	25	1226	1334	AC215247	142920	152122	100	99.77
b0166M05	1	20	679	709	NA	NA	NA	AC208683	146081	82739	99.67	99.55
c0383B21	1	20	696	724	25	1139	1243	AC205706	156375	49636	99.38	98.25
b0239N15	1	20	719	745	25	1046	1132	AC208685	126005	41689	99.87	99.5
c0168L17	1	20	744	782	25	984	1100	AC205902	170131	6182	0	98.8
b0584C08	1	20	777	802	25	916	1016	AC204663	103964	17565	99.7	99.86
c0319D11	1	20	790	834	25	829	948	AC205491	170342	80908	98.4	99.19
c0570O19	1	20	829	844	NA	NA	NA	AC229987	124479	565	98.16	98.06
c0021I07	1	20	839	877	25	702	830	AC206403	159833	11637	0	98.37
c0122M16	1	20	879	921	25	618	733	AC205576	166366	15108	99.46	99.88
c0250J07	1	20	920	953	25	477	593	AC198868	179559	146871	98.34	99.39
c0539J15	1	20	925	960	25	471	584	AC190893	172473	52566	99.07	100
b0575P17	1	20	965	1006	25	409	551	AC202914	188295	45509	97.23	0
b0276A09	1	20	997	1017	25	333	464	AC206861	117890	37743	100	99.86
c0292B16	1	20	1015	1045	25	249	407	AC211996	202351	45958	0	97.02
b0318D06	1	20	1038	1066	NA	NA	NA	AC202172	159379	32215	99.73	99.03
c0152K02	1	20	1058	1099	NA	NA	NA	AC194441	175712	49099	100	99.73
b0497J02	1	20	1089	1114	876	397	472	AC208802	116860	96895	99.23	99.57
c0060A13	1	20	1090	1127	25	13	140	AC186657	190504	9952	99.72	0
c0033M04	1	20	1123	1146	NA	NA	NA	AC211581	108731	48211	100	98.96
c0292B17	1	20	1142	1171	659	39	161	AC209817	179116	13720	98.98	99.2
b0276F16	1	20	1165	1193	659	109	227	AC208233	128776	19286	99.45	100
b0637N13	1	20	1190	1212	659	178	243	AC210717	117347	47318	99.52	99.86
b0541K07	1	20	1216	1238	NA	NA	NA	AC212113	144747	33521	99.5	95.53
c0360A22	1	20	1234	1270	1074	57	169	AC209908	146480	58124	96.39	99.74
b0490N11	1	20	1265	1295	1074	0	116	AC185593	150850	Right end	99.37
b0184I09	1	22	0	23	864	1144	1217	AC185494	114401	91425		99
c0460K15	1	22	5	34	NA	NA	NA	AC217907	169178	50853	99.88	97.31
c0083N12	1	22	25	64	864	986	1109	AC205668	212393	23651	100	99.58
c0102N14	1	22	59	94	864	882	1003	AC205537	192989	12331	99.73	100
c0547N01	1	22	89	121	864	779	906	AC207530	168375	5421	100	98.61
c0155D20	1	22	120	158	864	673	783	AC194433	190429	30563	99.5	97.96
c0009J22	1	22	147	185	NA	NA	NA	AC177851	191015	52946	99.65	98.57
c0079F07	1	22	177	198	864	519	616	AC191303	170802	49076	99.87	97.69
c0120K06	1	22	202	238	864	423	554	AC196491	202950	24799	99.63	99.3
c0335F22	1	22	228	263	864	348	430	AC203751	149739	10850	99.5	99.5
b0552F02	1	22	258	292	408	2204	2310	AC209402	126285	73437	99.07	0
c0417I11	1	22	280	315	864	165	306	AC214442	184337	64839	99.74	99.75
c0528J03	1	22	309	346	864	88	195	AC194020	210075	45624	99.81	0
c0376J05	1	22	336	373	864	18	98	AC186418	191171	Right end	99.86
c0039A03	1	23	6	46	675	2255	2362	AC195543	178970	69119		99.62
c0200I13	1	23	30	70	675	2173	2316	AC199569	185533	53308	93.36	98.35
b0067E19	1	23	55	84	675	2148	2219	AC204589	111114	19936	100	100
b0471N22	1	23	79	104	675	2066	2148	AC208708	141910	33369	99.86	99.76
c0091I01	1	23	103	131	675	1989	2081	AC205497	189230	39539	99.09	0
b0230O24	1	23	128	142	675	1938	2011	AC204542	130381	20210	99.87	99.53
c0449A14	1	23	145	179	675	1842	1944	AC208464	192471	45068	0	99.51
c0021H18	1	23	171	211	675	1756	1875	AC203045	163074	83011	98.5	99.85
c0428L06	1	23	187	228	NA	NA	NA	AC231400	195267	73468	98.94	100
c0040G20	1	23	214	248	675	1645	1763	AC214496	189881	51588	99.63	100
b0324F04	1	23	234	261	675	1591	1673	AC204552	138768	36537	99.74	99.86
c0264M04	1	23	252	278	675	1507	1601	AC205505	174665	0	97.58	99.07
c0247I04	1	23	279	313	675	1403	1518	AC210793	180656	38802	99.75	100
b0197N19	1	23	315	335	675	1332	1425	AC194916	149111	36079	99.51	95.85
c0546K21	1	23	338	374	675	1207	1362	AC186410	186240	42714	100	99.54
c0480H08	1	23	364	403	675	1128	1255	AC194044	185902	37369	98.78	99.62
b0210I24	1	23	393	416	664	15	100	AC231178	138025	118102	0	97.22
b0197L19	1	23	397	424	675	1065	1141	AC204085	130027	27352	100	100
c0506C24	1	23	428	459	675	963	1072	AC212809	197182	35786	99.87	99.38
b0314G16	1	23	449	476	675	885	1006	AC208693	130780	58114	99.73	99.78
c0215G13	1	23	471	508	675	800	932	AC195547	210541	69209	99.19	99.66
c0286P24	1	23	497	526	675	713	830	AC186430	164454	40127	99.45	99.59
c0020M24	1	23	537	573	675	628	758	AC204948	241385	51589	99.63	99.3
c0479I17	1	23	564	598	675	545	675	AC211667	186977	59512	99.64	98.85
b0157I20	1	23	589	616	675	500	579	AC215868	137589	66643	100	99.71
b0346E22	1	23	599	624	675	483	563	AC210904	117619	64864	99.84	99.87
c0497C03	1	23	629	660	675	362	488	AC196048	180601	44236	99.64	98.86
c0187O10	1	23	652	693	675	260	395	AC177900	181856	17061	98.4	99.64
b0281N24	1	23	685	711	675	213	280	AC190694	124668	85043	99.73	99.75
c0283E21	1	23	691	727	666	737	864	AC203914	189576	106734	99.87	100
c0118C21	1	23	705	738	675	109	233	AC197149	186835	900	99.58	99.87
c0143E18	1	23	743	775	NA	NA	NA	AC208517	195936	57836	97.14	99.31
c0022O03	1	23	764	799	887	41	174	AC202989	155748	44059	99.87	99.65
b0324G04	1	23	785	820	887	130	241	AC204553	176717	44915	100	98.24
b0091F19	1	23	818	847	887	216	312	AC204821	161994	28378	100	99.51
c0166K23	1	23	851	881	887	294	377	AC205284	160286	Right end	99.39
c0129K11	1	24	0	27	26	42	104	AC196014	148828	34031		99.27
b0325F20	1	24	19	38	26	73	154	AC200404	118899	15175	99.48	99.62
c0528M04	1	24	43	79	26	155	252	AC213614	188541	80828	100	99.86
c0052C17	1	24	64	103	26	211	334	AC190501	191044	114454	99.55	99.14
c0159O12	1	24	92	128	26	250	375	AC195466	166044	24527	99.46	99.55
c0342P18	1	24	118	154	NA	NA	NA	AC206958	188819	19768	98.99	98.64
c0359I10	1	24	169	203	949	93	194	AC216250	199273	74992	99.66	100
c0380J15	1	24	180	217	949	204	327	AC205663	180942	22444	99.76	99.65
c0129N12	1	24	211	243	949	273	401	AC197141	167128	8086	99.76	99.74
c0285K23	1	24	243	276	949	391	540	AC189040	179972	20362	100	99.74
b0295N14	1	24	275	302	949	535	625	AC196966	149558	36023	100	99.88
c0157J23	1	24	288	326	NA	NA	NA	AC217912	183019	68381	99.61	99.62
c0107K21	1	24	319	346	949	676	779	AC199831	175445	18518	99.62	99.61
c0392F24	1	24	344	382	NA	NA	NA	AC186415	191477	18190	0	99.74
c0324L14	1	24	395	438	876	1020	1121	AC194183	168906	75925	100	98.77
c0521P12	1	24	433	460	NA	NA	NA	AC217684	162610	11105	95.69	98.33
c0400H01	1	24	455	479	876	909	998	AC202005	131766	47934	100	99.26
c0007D12	1	24	465	507	NA	NA	NA	AC194732	192735	124636	99.34	99.86
b0240I09	1	24	509	544	876	776	897	AC190668	173935	63030	99.61	98.95
c0156P22	1	24	538	577	876	701	822	AC177906	177990	32092	99.42	99.12
c0102N17	1	24	574	606	876	612	733	AC191332	178444	31366	97.58	100
c0216J23	1	24	603	634	876	517	636	AC196411	184978	8983	99.04	99.86
c0247M14	1	24	631	656	876	438	535	AC208424	145081	66234	99.63	99.83
c0460M19	1	24	643	684	876	374	473	AC211246	197401	35633	99.19	96.5
c0044P07	1	24	674	713	876	256	386	AC215234	176727	7672	99.37	98.87
c0212K10	1	24	710	748	NA	NA	NA	AC229585	140919	22801	99.73	98.86
c0100I10	1	24	735	777	876	100	211	AC205578	190404	10000	100	0
c0390A13	1	24	770	801	876	15	132	AC211257	141849	102076	99.61	99.07
b0395G07	1	24	788	808	876	4	73	AC185602	112856	Right end	99.39
c0127O11	1	26	0	39	NA	NA	NA	AC196689	191780	21870		98.92
c0130M13	1	26	34	58	NA	NA	NA	AC204066	158591	15341	98.98	100
b0132P23	1	26	68	88	27	175	263	AC208680	104914	3301	99.52	99.47
c0045B05	1	26	90	122	27	238	384	AC211340	165438	50277	100	100
c0191A18	1	26	115	144	27	326	430	AC202999	154004	42809	100	99.64
c0191E11	1	26	133	158	27	400	488	AC197099	162563	87916	99.83	99.76
b0610I23	1	26	160	180	27	423	524	AC190534	137199	26875	100	98.86
c0001G21	1	26	175	213	NA	NA	NA	AC177896	217637	81369	99.17	99.87
b0353J24	1	26	204	227	27	598	666	AC202114	169264	43064	100	99.72
c0023K12	1	26	233	260	27	633	753	AC211390	171177	36715	99.86	99.77
c0334F05	1	26	248	292	27	691	790	AC206163	152369	94499	99.63	99.88
c0361I14	1	26	291	328	NA	NA	NA	AC211577	177302	8103	100	97.04
b0374A14	1	26	325	357	NA	NA	NA	AC197053	138664	78322	98.6	99.67
c0192G08	1	26	339	380	27	939	1052	AC186301	175616	15583	99.85	99.22
b0006J21	1	26	378	411	27	1041	1151	AC197137	134417	8806	98.87	100
c0529N01	1	26	416	454	27	1114	1237	AC205540	194105	28638	99.11	98.43
c0124M17	1	26	444	483	27	1200	1348	AC206523	175568	33592	100	100
c0455F17	1	26	484	504	27	1298	1379	AC213634	157191	75782	0	99.34
c0026N10	1	26	505	531	NA	NA	NA	AC194274	148500	101572	99.44	99.3
c0237L14	1	26	526	554	27	1414	1513	AC208072	180608	2561	99.74	99.53
b0568G15	1	26	581	607	27	1482	1597	AC204661	117636	7450	100	100
b0601M20	1	26	603	623	27	1575	1656	AC204664	117727	24247	99.57	99.83
c0333D07	1	26	619	660	27	1622	1783	AC205551	157861	30886	0	97.88
c0118J24	1	26	644	683	27	1751	1887	AC214639	191465	36848	99.88	0
c0486K09	1	26	674	711	27	1846	1973	AC186604	210195	22398	100	99.42
c0255E02	1	26	714	739	27	1965	2061	AC195853	153075	46596	97.79	99.88
c0270D04	1	26	730	764	27	2040	2129	AC203912	174392	43597	100	100
c0465I10	1	26	752	784	27	2102	2237	AC211918	168533	40485	100	98.84
c0160O20	1	26	778	811	27	2176	2333	AC213686	183423	42162	99.88	97.59
b0187K10	1	26	807	833	27	2282	2380	AC194914	164636	25132	99.67	0
c0537L13	1	26	825	864	27	2341	2431	AC186602	162605	43434	99.82	99.59
c0294L02	1	26	859	888	27	2427	2578	AC195459	169893	50250	98.89	0
c0342K11	1	26	884	917	NA	NA	NA	AC209215	185201	67830	98.96	96.58
c0148G18	1	26	902	929	239	1100	1216	AC208969	174118	54794	99.74	100
c0232J06	1	26	920	958	239	1008	1144	AC210268	173121	52384	99.62	99.89
c0417M07	1	26	942	977	NA	NA	NA	AC231741	179150	123263	99.18	99.86
c0158E19	1	26	958	994	239	861	1017	AC217315	190224	30095	98.83	99.87
b0124C03	1	26	985	1015	239	782	914	AC185518	148975	76989	100	100
c0127I01	1	26	1011	1049	239	722	865	AC205175	204140	19457	99.73	98.67
c0216F02	1	26	1041	1080	239	647	755	AC205272	181159	79334	100	100
c0396I03	1	26	1061	1094	NA	NA	NA	AC226579	133898	51640	97.8	100
c0222M10	1	26	1093	1133	239	521	657	AC205513	196287	47511	99.73	99.03
c0082J14	1	26	1109	1147	239	465	569	AC209025	158479	24872	99.51	99.64
c0066B19	1	26	1140	1175	NA	NA	NA	AC225062	142788	104465	99.09	99.6
c0528I12	1	26	1151	1182	239	353	460	AC185419	165028	65297	100	96.83
b0322K23	1	26	1177	1201	NA	NA	NA	AC217305	137792	28463	97.79	99.13
c0031O13	1	26	1199	1232	239	206	325	AC208974	190970	6552	100	98.35
c0151I01	1	26	1237	1275	239	113	243	AC194443	191900	28164	97.65	99.56
c0318J10	1	26	1269	1313	239	26	136	AC186223	172098	Right end	99.62
c0091J10	1	27	33	72	28	88	185	AC205498	177907	36526		99.5
c0029N07	1	27	64	81	28	152	249	AC205691	103050	75377	100	100
b0041J22	1	27	74	93	28	233	346	AC210084	125831	21935	100	100
c0187E02	1	27	86	115	28	265	393	AC205280	183613	35067	99.74	99.88
c0127K20	1	27	111	142	28	352	459	AC205293	165110	52607	100	98.39
b0272P20	1	27	138	165	28	416	502	AC205590	156030	67280	98.13	98.26
c0032K11	1	27	149	188	28	463	599	AC190912	193268	98954	100	100
b0139B16	1	27	171	198	NA	NA	NA	AC201750	145805	67023	98.87	99.88
c0017H23	1	27	200	230	28	552	707	AC213510	186771	14385	99.66	99.65
c0290A10	1	27	240	278	28	674	793	AC205558	176148	74960	99.88	99.48
c0117L14	1	27	266	301	28	738	849	AC206228	175901	42924	100	99.44
c0267E03	1	27	309	347	28	823	949	AC198483	232702	26256	99.69	99.14
c0027L16	1	27	344	383	28	928	1050	AC203178	162652	11392	99.76	100
Z_AI-0387C04	1	27	363	388	NA	NA	NA	AC225157	25953	11066	98.27	98.54
c0156B11	1	27	383	415	28	1035	1158	AC205077	157671	2535	100	99.76
c0547L16	1	27	415	443	NA	NA	NA	AC219078	132469	77868	99.67	99.67
c0379A14	1	27	415	455	NA	NA	NA	AC213525	176943	34604	98.11	98.82
c0132N01	1	27	447	484	28	1190	1346	AC197138	190967	20463	98.01	100
c0226E21	1	27	475	515	28	1347	1457	AC186306	177776	51799	98.9	99.12
b0235G10	1	27	509	530	28	1400	1496	AC196985	133587	87988	98.98	99.53
c0115E14	1	27	515	549	28	1440	1524	AC205579	188312	25346	100	99.48
c0005G14	1	27	540	569	28	1521	1578	AC207563	118877	41363	100	99.78
c0186J12	1	27	553	592	28	1547	1669	AC205373	170499	27357	100	99.86
c0150D23	1	27	586	625	28	1622	1790	AC214051	228086	37643	98.78	98.98
c0215L19	1	27	622	655	28	1740	1858	AC208627	189396	30850	99.87	99.25
b0443B08	1	27	648	676	28	1927	2005	AC185595	132092	84382	100	100
b0018D10	1	27	674	700	28	2004	2077	AC206635	138262	28242	100	99.86
c0163K06	1	27	702	737	28	2041	2167	AC205283	163637	36851	98.47	0
c0337J04	1	27	726	759	28	2161	2251	AC215862	168104	19663	93.68	0
b0637D21	1	27	753	777	28	2226	2319	AC204991	120264	52025	99.45	0
c0169P14	1	27	770	793	NA	NA	NA	AC226585	148108	56871	0	98.17
c0464A06	1	27	788	822	888	37	150	AC194846	211054	25534	95.53	99.16
c0133K22	1	27	818	852	NA	NA	NA	AC186340	192679	3051	97.44	99.04
c0043P24	1	27	852	878	888	330	434	AC198321	163720	23576	98.84	96.64
c0546I20	1	27	884	902	888	387	473	AC203975	136257	42989	99.62	99.86
c0071N17	1	27	898	926	888	444	542	AC209213	167131	68390	100	99.86
c0221C06	1	27	911	954	888	500	613	AC211699	175989	61949	99.74	98.47
c0016G08	1	27	940	980	888	548	712	AC204642	206023	54939	99.56	100
c0027K03	1	27	973	1009	888	668	754	AC192373	178939	67166	99.55	99.75
c0426F22	1	27	999	1027	NA	NA	NA	AC200854	150172	43619	99.85	99.74
c0089N24	1	27	1022	1059	888	765	857	AC205500	184624	17270	99.75	99.45
c0316H08	1	27	1053	1096	888	951	1069	AC205557	191146	56137	0	99.43
c0528I15	1	27	1090	1128	888	1011	1108	AC200228	176642	45622	99.86	99.43
b0307B03	1	27	1130	1164	NA	NA	NA	AC186010	155343	64358	100	100
c0025E24	1	27	1150	1185	888	1103	1230	AC194189	181770	70857	97.78	99.86
c0108L03	1	27	1172	1207	888	1241	1358	AC199958	209469	39278	0	99.88
c0301N08	1	27	1208	1239	888	1347	1450	AC214044	229871	25410	99.01	98.59
c0287L05	1	27	1233	1266	888	1418	1538	AC205618	169894	53705	100	99.87
c0172M02	1	27	1254	1291	888	1496	1613	AC205626	198466	54107	99.4	99.87
c0140H02	1	27	1284	1320	888	1563	1695	AC193312	168724	72169	98.71	99.31
b0371O10	1	27	1313	1335	888	1638	1732	AC198995	119332	12660	99.16	96.48
c0140P06	1	27	1333	1374	888	1714	1821	AC205289	156484	No cmp	99.49	No next cmp
c0566E03	1	27	1370	1400	888	1775	1885	#N/A	#N/A	No cmp	99.51	99.08
c0116K24	1	27	1395	1419	888	1840	1948	AC212149	158218	33481	No pre cmp	99.87
c0547D19	1	27	1404	1440	888	1922	2031	AC207528	207169	50554	98.19	99.61
c0157N11	1	27	1428	1464	888	2005	2099	AC194952	203548	95991	97.61	99.6
c0294O07	1	27	1454	1491	888	2053	2181	AC186283	183955	Right end	99.19
b0494I17	1	28	9	40	815	9	99	AC185594	129232	103072		99.86
c0477H20	1	28	31	66	815	25	161	AC212751	211866	63453	99.85	99.76
c0008B05	1	28	56	96	NA	NA	NA	AC203671	202331	39974	99.87	99.47
c0117J22	1	28	90	128	815	227	358	AC195061	170514	39177	99.36	99.75
c0474J11	1	28	121	156	815	343	462	AC202880	202151	95784	98.86	97.75
c0510I16	1	28	140	170	815	401	531	AC211573	182796	78190	99.6	99.73
c0376P12	1	28	163	194	815	472	616	AC207190	165234	6411	100	99.16
b0539G11	1	28	206	235	815	580	693	AC208236	165316	77018	100	99.87
c0460A12	1	28	216	250	815	636	768	AC209988	167192	59114	95.24	99.86
c0106C06	1	28	238	278	815	713	803	AC195263	197286	58227	99.72	100
c0393N13	1	28	265	302	815	779	882	AC211255	172927	85679	100	99.48
c0051O22	1	28	289	315	815	830	946	AC212360	181848	68460	98.7	99.49
b0382C11	1	28	305	331	815	1009	1074	AC205823	123789	76149	99.87	100
c0504N01	1	28	317	351	815	1046	1155	AC211555	187013	92314	97.08	100
c0524M04	1	28	330	360	815	1085	1198	AC210030	186737	55009	99.86	99.54
c0033G03	1	28	357	388	815	1145	1240	AC211264	166719	31566	97.15	99.73
b0395J06	1	28	397	421	815	1270	1352	AC202925	122946	No cmp	99.3	No next cmp
b0158K23	1	28	405	431	NA	NA	NA	#N/A	#N/A	No cmp	99.39	99.36
c0548N06	1	28	414	453	815	1340	1440	AC186598	158572	47921	No pre cmp	99.61
b0174E19	1	28	438	469	815	1415	1522	AC193970	121430	15140	99.75	99.78
b0514G23	1	28	470	497	NA	NA	NA	AC200473	134611	19829	99.4	97.54
c0067K06	1	28	500	540	29	3553	3641	AC210801	157804	76979	99.6	98.37
c0268F17	1	28	516	559	29	3505	3611	AC202389	165744	88449	99.75	99.76
c0192P17	1	28	537	582	29	3461	3573	AC194369	168080	61841	100	99.72
c0472D13	1	28	562	612	29	3341	3497	AC186324	186830	34287	99.54	99.75
c0350D18	1	28	606	643	29	3242	3401	AC210673	169675	61135	100	98.8
c0197D03	1	28	637	682	29	3212	3331	AC215985	177590	21395	98.8	98.4
b0123O17	1	28	677	705	29	3164	3248	AC205601	143355	35198	99.68	99.86
c0228E07	1	28	697	733	29	3070	3177	AC212690	191489	66953	99.36	98.76
c0465E18	1	28	720	755	29	2931	3098	AC214292	190647	45524	99.65	98.98
b0454H11	1	28	747	772	29	2907	2990	AC192152	114252	25927	99.33	99.72
c0197E08	1	28	762	794	29	2785	2912	AC202094	209315	75668	99.7	99.58
c0406N13	1	28	780	814	29	2764	2854	AC209943	173143	52296	93.48	99.75
b0526E10	1	28	806	832	29	2737	2805	AC185590	112422	16819	99.68	99.83
c0081L15	1	28	829	867	29	2655	2743	AC209821	169108	47266	98.46	98.52
c0324D01	1	28	850	893	29	2533	2668	AC208547	167694	74165	98.79	99.86
c0334D03	1	28	878	910	29	2492	2645	AC207114	178617	38372	99.37	99.86
b0293K02	1	28	899	921	29	2438	2536	AC205964	127163	67171	100	99.76
c0197F11	1	28	912	947	29	2312	2460	AC209686	169719	49744	99.5	100
c0120K07	1	28	935	975	29	2207	2323	AC206789	222192	86229	98.25	99.86
b0473D03	1	28	964	1000	29	2096	2205	AC203938	174962	57233	99.42	99.24
c0050H23	1	28	986	1022	29	1980	2112	AC208444	192163	47656	99.15	98.74
c0231K01	1	28	1014	1047	NA	NA	NA	AC213793	181843	85296	100	99.33
c0069P06	1	28	1038	1067	29	1866	1985	AC205715	161768	28896	100	98.28
b0495N21	1	28	1065	1094	29	1782	1888	AC205817	144679	14390	100	100
c0313N19	1	28	1089	1120	29	1721	1809	AC215913	171183	75352	97.88	98.63
c0196E21	1	28	1104	1132	29	1599	1721	AC209685	177980	80247	99.6	99.06
b0638N04	1	28	1126	1159	29	1495	1629	AC193334	162546	63791	98.64	99.87
c0261M08	1	28	1140	1176	29	1462	1562	AC199924	137520	19719	99.74	99.88
c0233A06	1	28	1150	1170	NA	NA	NA	AC225815	178630	149048	98.82	99.18
c0155M09	1	28	1165	1207	NA	NA	NA	AC214454	172747	72766	99.72	100
c0337N02	1	28	1191	1224	29	1303	1425	AC215863	185748	13734	100	98.02
b0007F03	1	28	1232	1261	29	1247	1313	AC205588	147898	31646	100	99.26
c0120K24	1	28	1264	1297	29	1130	1263	AC206290	170211	29046	99.87	99.08
b0242O12	1	28	1284	1313	29	1049	1165	AC193337	144762	5127	98.64	100
c0262P09	1	28	1323	1354	29	947	1047	AC199766	159589	29744	100	99.77
b0120G16	1	28	1345	1366	NA	NA	NA	AC216859	146770	92533	98.87	99.47
c0299F10	1	28	1350	1388	29	813	971	AC205710	164068	42803	99.49	99.85
c0001P04	1	28	1374	1407	29	750	841	AC208719	215637	63878	100	99.62
c0451G20	1	28	1411	1437	29	685	775	AC214527	193440	30515	97.95	99.69
c0017C08	1	28	1431	1469	29	600	718	AC177905	207902	12670	99.33	99.48
c0203B10	1	28	1465	1501	29	464	615	AC214973	198234	53446	97.81	99.7
c0192E16	1	28	1507	1534	29	409	508	AC210780	179649	103314	99.46	98.58
c0145K22	1	28	1515	1554	29	340	469	AC190877	200311	91064	98.11	98.32
c0137E10	1	28	1544	1583	29	293	408	AC211271	167563	81299	99.17	99.84
c0525A08	1	28	1569	1605	29	235	349	AC214155	177165	76400	98.73	0
c0530A21	1	28	1592	1633	29	167	298	AC211633	174078	66775	99.12	100
c0469J18	1	28	1615	1647	29	105	218	AC216218	206954	18644	99.87	99.04
c0394J11	1	28	1649	1677	29	14	110	AC194856	177495	93730	99.75	0
b0628N19	1	28	1666	1691	NA	NA	NA	AC209094	114236	29635	96.12	0
c0264P14	1	28	1682	1713	810	4	88	AC186620	153664	29093	99.54	99.72
c0541N09	1	28	1709	1728	810	72	164	AC194831	115975	28437	99.86	100
c0160N18	1	28	1721	1748	810	135	273	AC208199	174074	22846	98.62	98.3
c0240E23	1	28	1749	1782	810	238	383	AC205842	186805	42787	97.84	97.41
c0148F22	1	28	1787	1827	810	328	463	AC204063	185672	21185	99.28	99.88
c0320A06	1	28	1821	1858	NA	NA	NA	AC194588	156448	48351	99.59	99.05
c0396C17	1	28	1857	1890	810	487	573	AC186321	148761	Right end	100
b0129F23	1	29	0	30	NA	NA	NA	AC190546	160978	74616		99.85
b0283D14	1	29	25	52	NA	NA	NA	AC193947	142607	25713	99.4	99.2
c0186F03	1	29	41	71	31	110	212	AC199932	170298	102352	98.2	98.63
c0465I18	1	29	55	89	31	145	263	AC207388	182075	42461	95.26	99.51
c0186L01	1	29	82	118	31	215	317	AC205692	175830	48134	97.8	99.11
b0219A14	1	29	106	134	31	310	393	AC205593	122332	21509	100	100
c0132C18	1	29	131	161	31	340	471	AC212246	179879	41075	99.63	98.19
c0193F23	1	29	154	191	31	424	561	AC199795	183467	16185	99.68	99.86
c0119N06	1	29	184	228	31	537	663	AC193397	203307	21489	99.73	99.44
c0522J19	1	29	225	255	31	650	792	AC204841	187236	65230	99.47	99.56
c0029O21	1	29	253	287	31	715	830	AC212138	179958	31684	100	98.65
c0167C04	1	29	296	327	31	806	934	AC211732	158657	24899	99.06	99.05
c0104O05	1	29	321	355	31	895	1018	AC210844	194313	44828	97.94	99.5
c0296N20	1	29	350	375	31	953	1081	AC204301	173514	28153	98.58	100
c0135E07	1	29	372	400	31	1057	1196	AC186238	172808	109998	98.89	99.7
c0001M03	1	29	383	417	31	1126	1262	AC195786	222942	28373	96.58	99.75
c0113P06	1	29	411	442	31	1214	1336	AC200673	155770	70220	99.75	100
c0365E22	1	29	438	470	31	1271	1395	AC209914	151875	44284	99.64	99.06
b0029B16	1	29	470	504	31	1326	1436	AC212063	151358	38533	100	96.96
b0123C22	1	29	493	523	31	1411	1507	AC203280	145100	17498	99.49	99.54
c0042N20	1	29	522	562	31	1541	1676	AC197716	176323	28551	99.29	99.84
c0121O18	1	29	554	588	31	1656	1766	AC206525	195087	84899	96.7	97.43
c0538H13	1	29	577	611	31	1718	1821	AC205464	176331	6924	99.88	99.41
c0031F20	1	29	616	645	30	2759	2855	AC211337	155666	77877	99.74	99.55
b0582K08	1	29	628	655	30	2712	2805	AC210911	146499	84009	99.72	99.15
b0174K15	1	29	641	672	30	2664	2771	AC213993	164082	67616	99.5	99.84
c0188B17	1	29	663	693	30	2567	2689	AC194404	180757	1313	100	98.21
c0274M02	1	29	695	732	NA	NA	NA	AC186288	199136	95978	99.24	99.85
c0426F18	1	29	733	761	30	2403	2527	AC204747	181366	83311	99.48	99.3
b0183O24	1	29	748	779	30	2366	2476	AC205658	129621	16708	99.88	99.4
c0207M03	1	29	791	824	30	2273	2384	AC211267	162563	21745	99.88	98.8
c0299P12	1	29	822	856	30	2185	2304	AC214238	175576	4145	98.55	100
c0049D18	1	29	864	910	30	2055	2188	AC194257	211784	57754	95.71	99.76
c0388L08	1	29	893	930	NA	NA	NA	AC214235	182651	63239	99.2	99.43
c0435L14	1	29	921	956	30	1875	2028	AC209969	176323	58151	95.31	99.87
c0226C16	1	29	947	978	30	1816	1956	AC210517	138908	34827	100	99.87
c0380G03	1	29	968	1001	NA	NA	NA	AC202185	174665	49030	98.15	98.66
c0342O02	1	29	989	1029	30	1638	1773	AC194864	181280	14021	98.7	100
c0212D07	1	29	1018	1062	30	1535	1658	AC177887	190639	58364	0	99.4
b0443C05	1	29	1055	1081	NA	NA	NA	AC217044	132534	57924	99.06	97.54
c0059G18	1	29	1071	1101	30	1444	1568	AC205717	180167	87999	98.37	99.24
c0028G21	1	29	1084	1117	30	1363	1478	AC215169	193216	No cmp	96.56	No next cmp
c0141K12	1	29	1111	1149	NA	NA	NA	#N/A	#N/A	No cmp	97.89	97.89
c0194K14	1	29	1117	1137	30	1310	1416	AC212568	128780	0	No pre cmp	99.76
c0086J04	1	29	1135	1173	30	1185	1313	AC213981	189508	24350	96.88	99.73
b0245P14	1	29	1162	1194	30	1119	1230	AC202420	152740	30103	99.43	99.88
c0203E19	1	29	1205	1229	30	1055	1158	AC195789	186618	21601	0	100
c0396I12	1	29	1235	1268	30	913	1037	AC187259	211479	20414	98.94	99.61
b0322M19	1	29	1267	1301	30	757	819	AC196952	147627	52531	99.15	99.26
c0276C13	1	29	1292	1327	30	692	783	AC201806	181482	52990	98.85	99.35
c0299K14	1	29	1320	1360	30	623	736	AC212365	199451	34628	99.74	99.64
c0539P20	1	29	1359	1380	30	521	627	AC198690	150334	20336	99.06	100
c0036G01	1	29	1379	1414	30	399	554	AC192242	184024	15517	99.49	99.36
c0277O19	1	29	1408	1447	30	333	419	AC205070	194401	61485	100	99.56
b0494G02	1	29	1435	1467	30	268	357	AC210220	165752	100903	99.16	99.33
c0087F07	1	29	1467	1497	30	246	348	AC205689	172681	76757	99.74	98.42
b0124I16	1	29	1483	1507	30	195	270	AC205598	111649	32172	99.88	99.88
c0381L13	1	29	1497	1532	30	131	226	AC207225	130641	30331	99.28	100
c0419N15	1	29	1521	1553	30	44	176	AC207662	162248	33069	99.72	98.71
b0318C04	1	29	1557	1587	30	3	73	AC185608	135476	Right end	99.85
c0300M22	1	30	0	22	NA	NA	NA	AC196969	173674	5653		98.84
c0245E14	1	30	30	62	948	1756	1821	AC204319	181161	76969	99.87	100
c0250L19	1	30	41	72	NA	NA	NA	AC226324	168794	74577	99.57	99.37
c0112L13	1	30	63	94	948	1657	1766	AC203062	198255	63840	96.5	99.76
c0067G03	1	30	81	116	948	1601	1695	AC209437	168317	59989	100	99.61
c0021B17	1	30	101	141	948	1531	1623	AC213593	174936	49172	99.72	99.88
c0148C12	1	30	129	166	948	1439	1557	AC206986	177706	65431	99.86	98.74
c0152D21	1	30	160	193	948	1377	1500	AC193756	179286	56279	98.76	99.88
c0397D16	1	30	210	240	948	1332	1449	AC200048	179289	53929	98.97	97.58
c0456G13	1	30	237	278	948	1252	1359	AC209986	210892	13989	99.75	97.15
b0193M19	1	30	268	298	NA	NA	NA	AC226602	123941	50278	99.86	99.62
b0413L23	1	30	280	313	948	1130	1200	AC207701	132187	35019	98.91	99.85
c0152P11	1	30	303	336	948	1059	1164	AC194436	166333	13905	98.7	99.66
c0517N22	1	30	330	360	948	960	1061	AC211624	157857	23602	99.88	99.41
c0462I19	1	30	355	393	948	875	988	AC211747	163068	54006	98.82	100
c0271P11	1	30	383	421	948	812	915	AC208435	196015	77425	100	99.74
c0193L01	1	30	405	444	948	741	854	AC200418	185987	35046	99.74	99.7
c0415C15	1	30	435	472	948	648	766	AC194092	166652	28168	100	100
c0256L07	1	30	461	495	948	571	668	AC186659	173327	27925	99.85	99.58
c0346A10	1	30	495	522	948	484	585	AC196091	138117	14418	99.85	99.86
c0091M07	1	30	540	553	948	387	512	AC202951	160873	3724	100	98.57
c0419J03	1	30	548	575	948	314	413	AC209958	103595	19679	99.74	100
c0393L23	1	30	577	617	948	207	347	AC203981	190165	102208	0	98.31
c0030N15	1	30	590	633	948	175	296	AC190889	198504	79012	99.76	96.86
c0297F01	1	30	615	662	948	80	190	AC210604	181972	87339	99.18	99.18
c0243B03	1	30	640	678	948	3	150	AC210594	200239	25859	98.43	98.36
b0640G17	1	30	651	689	NA	NA	NA	AC231421	111683	47311	98.9	99.34
c0552L07	1	30	655	675	NA	NA	NA	AC234192	133765	40607	97.36	99.27
c0253E17	1	30	698	729	769	27	129	AC213611	164464	67406	99.86	99.85
c0280D04	1	30	718	754	769	95	194	AC194293	187897	43348	98.89	99.46
c0200J23	1	30	750	791	769	177	282	AC186530	197540	147667	99.44	99.83
c0100H01	1	30	756	797	NA	NA	NA	AC199095	186559	38423	99.73	99.5
b0496M02	1	30	785	815	769	261	347	AC193431	110581	24010	99.51	100
c0347C15	1	30	807	850	NA	NA	NA	AC220925	196473	106545	99.01	99.4
c0493P13	1	30	820	851	769	358	473	AC202183	199975	77808	99.28	99.62
c0384P19	1	30	841	875	769	394	512	AC207470	157618	37113	99.33	99.32
c0222O04	1	30	860	899	769	453	605	AC214423	186872	36908	0	99.66
c0118F19	1	30	912	952	NA	NA	NA	AC205995	178250	99318	98.63	98.42
c0012P04	1	30	928	968	769	614	731	AC213802	229429	58378	96.25	0
c0179P10	1	30	973	1002	769	701	822	AC209873	173031	38404	99.5	99.49
b0132G05	1	30	992	1014	NA	NA	NA	AC208678	116459	18192	99.86	100
c0148H09	1	30	1008	1056	676	1283	1435	AC209712	172285	26958	99.48	98.59
c0299I05	1	30	1052	1080	676	1210	1327	AC194896	168371	22638	98.77	98.35
c0447E15	1	30	1077	1113	676	1119	1255	AC186509	184782	27703	0	99.47
c0524B21	1	30	1114	1150	676	1037	1150	AC194676	191881	10916	99.1	99.42
b0345N21	1	30	1144	1169	NA	NA	NA	AC231599	89855	22765	98.41	99.05
c0152G07	1	30	1164	1206	676	867	1008	AC205421	186096	2016	97.72	98.91
c0209M18	1	30	1208	1250	676	742	883	AC198381	191836	39340	100	99.87
c0024M06	1	30	1243	1278	676	671	787	AC192401	172922	35400	99.04	99.74
c0016H01	1	30	1277	1323	676	566	703	AC214450	220810	37489	99.75	99.63
b0161O05	1	30	1304	1330	676	500	596	AC205596	135501	38261	100	99.65
b0181C07	1	30	1325	1348	676	445	535	AC225638	125003	71601	99.59	99.63
c0019B10	1	30	1333	1372	676	382	498	AC213973	187495	38769	100	100
c0490O23	1	30	1366	1403	676	263	413	AC211554	204462	136620	98.6	99.74
c0064J07	1	30	1382	1421	676	243	369	AC207562	183506	19666	99.68	98.48
c0022H24	1	30	1410	1449	676	97	246	AC194827	219256	121253	98.99	100
c0192I12	1	30	1433	1475	676	112	203	AC212975	185705	54558	100	100
c0068P11	1	30	1464	1492	676	4	96	AC211172	165791	42365	99.43	99.85
c0498G11	1	30	1485	1505	NA	NA	NA	AC234187	184654	105539	98.44	99.05
c0322N13	1	30	1503	1540	773	0	115	AC209882	159368	40617	99.87	99.75
c0317M09	1	30	1540	1582	773	111	239	AC202533	189188	53788	0	0
c0236F08	1	30	1562	1604	773	204	308	AC186526	192028	26512	99.68	99.43
c0038F19	1	30	1600	1610	773	253	343	AC195126	197556	143884	98.41	99.75
c0055P14	1	30	1605	1639	773	318	430	AC196778	181265	86499	99.73	99.85
c0158E05	1	30	1621	1656	773	406	516	AC183947	251241	27158	96.71	0
c0283K20	1	30	1652	1691	622	1841	1964	AC190550	190114	100675	98.48	98.1
c0084H11	1	30	1671	1708	NA	NA	NA	AC204366	176027	37899	99.68	99.47
c0260L21	1	30	1696	1734	622	1751	1860	AC194601	157970	12908	100	98.67
c0152B13	1	30	1724	1761	622	1628	1771	AC186338	168769	81508	99.46	99.66
c0119N21	1	30	1755	1796	622	1556	1704	AC211213	198099	113643	99.52	99.22
c0308E15	1	30	1781	1810	622	1536	1647	AC195159	156712	65365	99.22	99.35
c0151F12	1	30	1792	1837	622	1486	1585	AC213797	192707	66834	95.15	99.57
c0106J23	1	30	1826	1868	622	1395	1525	AC211217	192026	49267	99.01	99.46
c0315F23	1	30	1870	1905	622	1364	1489	AC195540	202694	87915	99.7	96.73
c0326E07	1	30	1886	1928	NA	NA	NA	AC186319	164966	66274	99.87	99.6
b0154K15	1	30	1918	1947	622	1236	1335	AC194909	139751	12908	99.6	99.27
c0306G15	1	30	1943	1970	622	1127	1239	AC200492	169894	29541	99.33	99.24
b0368E21	1	30	1963	1996	622	1078	1160	AC212402	122107	4695	97.34	0
b0544K16	1	30	2003	2026	622	1010	1095	AC209401	102159	54621	99.85	99.68
c0193I01	1	30	2012	2053	622	950	1097	AC210782	188667	No cmp	99.84	No next cmp
b0236G19	1	30	2033	2064	NA	NA	NA	#N/A	#N/A	No cmp	98.58	99.67
b0370C07	1	30	2045	2082	622	846	950	AC186008	152188	76690	No pre cmp	99.24
b0630E24	1	30	2065	2103	NA	NA	NA	AC204825	171452	70506	92.99	97.52
b0314N09	1	30	2092	2118	NA	NA	NA	AC217258	124043	13763	99.46	100
c0232I16	1	30	2105	2147	622	640	757	AC205847	171455	90270	97.93	99.72
c0382F24	1	30	2129	2170	622	604	745	AC209394	187863	44951	99.61	100
c0442C12	1	30	2160	2189	NA	NA	NA	AC225184	182090	84805	99.17	98.31
b0153I01	1	30	2184	2210	622	470	539	AC209089	108544	16948	0	98.58
c0156N19	1	30	2206	2246	622	367	509	AC186232	144228	41515	0	99.18
c0504K09	1	30	2235	2269	622	280	399	AC207468	188584	62187	99.86	98.25
c0058N24	1	30	2262	2292	NA	NA	NA	AC217829	182043	98285	99.48	100
c0114K21	1	30	2284	2316	622	138	282	AC191999	305424	12968	100	99.22
b0355N05	1	30	2311	2342	NA	NA	NA	AC190763	156596	77778	100	99.48	AC147789
c0463I04	1	30	2337	2366	622	16	113	AC191028	159340	54676	99.33	100
b0125G10	1	30	2362	2388	NA	NA	NA	AC214443	151276	64796	98.84	98.37
b0627D06	1	30	2396	2418	32	15	94	AC212110	117129	22387	100	100
c0539P04	1	30	2425	2453	32	74	221	AC210612	192288	23320	98.03	98.35
c0172J04	1	30	2451	2483	32	163	325	AC208412	177363	55884	98.73	97.92
c0319M18	1	30	2475	2519	32	270	365	AC208453	170375	35380	97.96	98.68
c0003M09	1	30	2507	2545	NA	NA	NA	AC205417	198932	116901	99.39	99.87
c0240A20	1	30	2520	2568	32	374	525	AC208419	215391	31369	98.76	97.18
c0003G18	1	30	2590	2621	32	474	595	AC216370	210573	13461	99.45	99.4
c0168I23	1	30	2623	2657	32	584	719	AC191584	171835	19449	98.55	0
b0144E03	1	30	2645	2677	32	694	802	AC194823	144469	35565	98.8	99.74
c0123B16	1	30	2669	2717	32	771	892	AC187290	190650	6696	100	99.72
b0409K22	1	30	2709	2735	32	895	965	AC197233	122427	8047	99.85	99.23
c0534M01	1	30	2730	2761	NA	NA	NA	AC202896	163991	55303	99.7	100
c0102P09	1	30	2751	2788	32	986	1102	AC205997	156401	22984	99.64	99.25
c0042I18	1	30	2780	2818	32	1057	1153	AC215172	170226	48128	99.87	99.58
c0242B11	1	30	2809	2843	32	1175	1304	AC206195	184916	16315	0	99.2
c0390O17	1	30	2844	2869	32	1283	1396	AC212326	162828	67428	99.73	98.97
b0362I14	1	30	2858	2877	NA	NA	NA	AC226551	118473	52306	98.53	99.08
b0288O21	1	30	2872	2889	32	1384	1465	AC208124	117516	57956	100	99.85
b0269I07	1	30	2880	2897	NA	NA	NA	AC217653	139923	73091	99.72	99.44
b0234G06	1	30	2891	2909	32	1460	1544	AC185490	111369	Right end	99.43
c0042H07	1	31	7	44	981	27	172	AC194905	157660	0		0
c0268L19	1	31	63	102	33	53	162	AC190612	170651	35646	0	0
c0114A19	1	31	97	124	33	106	242	AC203262	171624	59315	99.47	100
b0358F01	1	31	119	149	33	209	309	AC207812	150473	26471	100	0
c0401I08	1	31	145	177	33	269	373	AC208923	154729	11166	99.87	99.34
c0408N02	1	31	173	203	33	360	469	AC210254	189145	27292	99.62	99.4
c0299B09	1	31	199	238	33	462	564	AC200138	179426	78383	99.5	99.36
c0023K07	1	31	220	253	33	505	613	AC194070	178105	15381	97.44	99.61
c0419B11	1	31	247	282	NA	NA	NA	AC214747	175035	99116	99.87	99.78
c0151P02	1	31	259	294	33	658	744	AC210172	162077	48797	99.75	100
b0178A22	1	31	286	309	33	715	783	AC210898	101798	62947	99.66	99.56
b0105F05	1	31	296	325	33	742	824	AC208354	141831	73800	99.53	99.58
c0234H12	1	31	319	348	33	768	889	AC211968	174776	96212	99.6	99.74
c0027C03	1	31	339	376	NA	NA	NA	AC199707	176064	89097	99.26	99.75
c0527I22	1	31	365	401	33	917	1024	AC194019	191964	48156	0	99.23
c0308L11	1	31	397	435	33	1136	1274	AC186425	169032	22974	100	99.74
b0598N14	1	31	425	459	33	1211	1329	AC194386	147747	6269	95.48	97.03
c0284L24	1	31	460	495	33	1323	1425	AC204414	188132	4377	97.42	99.55
c0067H15	1	31	487	528	33	1415	1511	AC211265	185985	52066	99.71	99.87
c0455F21	1	31	511	553	33	1503	1596	AC199850	192510	22944	99.62	99.11
c0373C02	1	31	550	594	NA	NA	NA	AC186284	196147	17897	99.17	99.77
c0036F07	1	31	588	616	33	1671	1773	AC195972	167944	39484	100	98.73
c0310B18	1	31	609	647	33	1763	1889	AC208919	183070	13861	99.76	100
b0630A24	1	31	641	673	33	1859	1996	AC205812	161504	15766	99.87	100
Z_AI-0602O11	1	31	670	680	NA	NA	NA	AC219172	37586	12698	98.85	99.86
c0143F19	1	31	674	720	NA	NA	NA	AC209717	216421	102465	100	99.31
c0288P06	1	31	707	736	33	2102	2203	AC195125	163837	36270	99.8	99.73
c0454O22	1	31	725	766	33	2191	2290	AC186654	183631	23539	99.74	100
c0277F10	1	31	756	792	33	2268	2378	AC206682	152774	42199	99.84	99.84
c0272H01	1	31	794	827	33	2352	2479	AC213976	182443	128817	99.38	98.9
c0491J08	1	31	820	855	NA	NA	NA	AC234186	183182	43484	99.33	98.78
c0226O09	1	31	850	875	NA	NA	NA	AC231486	136865	31932	98.27	99.63
b0368I06	1	31	873	890	33	2527	2582	AC202145	101865	27734	96.87	100
b0230L06	1	31	886	915	33	2613	2694	AC197469	190191	38724	99.54	100
b0320G12	1	31	909	939	33	2675	2773	AC202150	131008	16426	100	99.49
b0422J03	1	31	940	963	33	2754	2831	AC206937	120784	69267	99.86	100
c0035G15	1	31	967	998	NA	NA	NA	AC219150	160233	72749	100	98.3
c0327I17	1	31	994	1026	33	2816	2918	AC212818	194404	42707	98.75	98.21
b0148K02	1	31	1029	1056	NA	NA	NA	AC193400	140246	76411	0	99.12
c0196M02	1	31	1048	1078	NA	NA	NA	AC186303	146718	92352	100	99.86
c0219O04	1	31	1077	1118	33	2998	3105	AC192378	189506	22920	99.75	97.86
c0251O13	1	31	1108	1144	33	3095	3203	AC197257	171373	27436	99.74	100
c0008J10	1	31	1136	1163	33	3175	3249	AC204372	92172	59230	99.51	99.46
b0582P09	1	31	1148	1192	33	3201	3300	AC209404	152116	21445	99.02	99.27
c0547A20	1	31	1184	1220	33	3282	3365	AC212576	144665	47010	100	98.64
c0112E13	1	31	1207	1247	33	3336	3441	AC186167	196324	68488	100	99.73
c0155D02	1	31	1233	1267	33	3385	3469	AC203004	173716	1576	98.36	99.87
c0336D14	1	31	1281	1317	33	3498	3624	AC209896	177696	110114	99.71	99.39
c0320H13	1	31	1310	1345	33	3551	3671	AC206607	169051	943	100	99.63
c0454G11	1	31	1339	1376	33	3659	3743	AC196058	173128	15978	99.84	99.86
c0266P05	1	31	1372	1411	NA	NA	NA	AC186517	181738	18533	99.62	99.86
c0028K07	1	31	1406	1438	33	3842	3948	AC194265	175706	88519	96.99	98.84
c0324H21	1	31	1437	1468	33	3902	4018	AC214976	194441	5824	99.87	99.72
c0085O24	1	31	1465	1499	33	4009	4108	AC205714	157080	14553	98.3	100
b0288A10	1	31	1505	1536	33	4097	4192	AC205880	143360	51993	99.76	99.47
c0395J18	1	31	1518	1548	NA	NA	NA	AC217941	148938	14164	98.31	99.11
b0414O10	1	31	1552	1575	33	4233	4299	AC185600	121813	Right end	100
b0277B18	1	32	0	22	34	1698	1795	AC185614	158015	62999		100
c0151H13	1	32	11	53	34	1579	1731	AC214365	217863	39357	97.57	94.27
c0241H08	1	32	36	74	34	1535	1623	AC208308	148477	27784	97.31	99.87
c0467J22	1	32	77	121	34	1406	1546	AC207469	183126	77422	99.12	97.89
c0141H21	1	32	101	132	34	1357	1474	AC205423	190512	29277	98.59	99.38
b0235D08	1	32	126	154	34	1311	1400	AC190661	139882	6767	99.67	99.75
c0056L20	1	32	159	206	34	1189	1318	AC177839	200931	47200	99.87	99.62
b0502J08	1	32	189	213	34	1122	1240	AC190808	148334	77727	99.84	99.31
c0345D06	1	32	205	220	34	1073	1168	AC210816	173310	105398	97.74	99.57
c0331G09	1	32	215	228	34	1025	1168	AC203387	140107	61237	97.13	99.44
b0169J16	1	32	223	244	34	1010	1088	AC213759	140266	65189	99.14	99.17
c0474A23	1	32	230	272	34	917	1038	AC211672	184821	27346	98.54	99.88
c0392M21	1	32	267	304	34	847	986	AC205323	181571	36217	99.88	99.77
b0507F23	1	32	314	347	NA	NA	NA	AC198689	158794	8701	100	99.66
c0062P19	1	32	344	380	NA	NA	NA	AC211998	192081	9538	99.64	99.65
b0166D22	1	32	377	402	NA	NA	NA	AC217277	136716	81997	99.86	99.36
c0219H23	1	32	397	428	34	486	604	AC208205	170563	63763	99.6	99.88
b0422I23	1	32	441	465	34	405	529	AC205821	111999	20889	100	100
c0545G17	1	32	460	492	34	315	469	AC199578	166267	46653	0	99.03
c0229D04	1	32	488	527	34	233	370	AC194046	172928	22351	97.81	0
c0434G21	1	32	506	544	34	119	268	AC216726	182331	46452	99.75	96.3
c0387L22	1	32	547	572	34	42	167	AC211222	172536	62004	98.54	0
b0308D22	1	32	565	584	NA	NA	NA	AC231634	109293	No cmp	98.8	No next cmp
b0329E15	1	32	575	590	NA	NA	NA	#N/A	#N/A	No cmp	0	99.31
b0033F17	1	32	583	605	NA	NA	NA	AC233925	127398	74249	No pre cmp	99.76
c0258N01	1	32	584	610	663	30	151	AC208215	126441	23737	99.48	99.37
c0050N17	1	32	603	645	663	120	252	AC211940	173875	56282	99.55	99.32
c0230P11	1	32	644	684	663	203	351	AC186525	192162	66500	99.83	97.64
c0310C11	1	32	662	692	663	288	440	AC193615	183231	35083	98.95	99.77
c0476J08	1	32	679	718	663	384	490	AC199540	171095	18382	94.3	99.62
b0324A23	1	32	709	734	663	457	551	AC205965	131872	36278	99.75	100
c0206H20	1	32	727	759	663	511	629	AC214634	184052	96615	98.21	99.34
c0175I19	1	32	760	791	663	565	684	AC215508	181937	29263	99.48	99.21
b0140K22	1	32	787	809	NA	NA	NA	AC195456	98214	3001	99.02	98.79
c0268E22	1	32	819	858	663	713	841	AC186518	197949	3748	100	99.52
b0440F12	1	32	857	889	663	834	933	AC197073	156595	85454	99.48	99.57
c0077O05	1	32	873	912	663	884	993	AC211330	191107	41737	99.77	99.12
c0382C18	1	32	903	932	663	970	1082	AC209923	146592	46148	99.36	100
c0146O23	1	32	933	966	663	1027	1146	AC208718	171987	31802	99.67	100
c0321I14	1	32	965	1000	663	1130	1232	AC194606	171969	48029	98.91	98.17
c0159E20	1	32	984	1026	663	1185	1284	AC186334	180534	26329	99.56	99.07
c0396P02	1	32	1023	1053	663	1256	1397	AC204560	188547	81481	99.26	99.57
c0179K09	1	32	1038	1075	NA	NA	NA	AC194587	200652	27880	98.57	99.54
c0538J08	1	32	1072	1105	663	1455	1539	AC186506	157577	Right end	99.84
c0160J06	1	33	0	22	35	3	103	AC186230	159630	23525		98.29
c0259M13	1	33	26	58	35	66	173	AC196717	195096	34074	99.62	98.32
c0417O20	1	33	56	90	35	164	273	AC204013	167594	127049	100	100
c0410H16	1	33	85	143	35	235	374	AF546187	478466	0	98.23	0
b0276L07	1	33	138	166	35	371	514	AC203349	138392	89575	0	100
c0135J01	1	33	147	183	35	431	551	AC177918	172355	18163	100	99.56
c0437J16	1	33	179	216	35	521	656	AC191727	198737	70083	99.85	96
b0504B22	1	33	195	223	35	604	676	AC208710	113136	6244	99.5	99.72
c0271J06	1	33	220	254	35	653	750	AC194869	168845	32734	100	98.67
b0139F04	1	33	251	270	35	737	805	AC190566	134101	87119	99.49	99.87	AC155384
b0338F17	1	33	257	280	35	750	832	AC195880	145773	47926	100	99.86
b0335O19	1	33	270	302	NA	NA	NA	AC217807	133897	60902	99.56	100
b0355K04	1	33	287	320	35	856	934	AC201882	137022	68947	100	100	AC146814
c0254C05	1	33	308	345	35	881	992	AC198487	162827	84547	100	99.81
c0537B15	1	33	341	369	35	949	1042	AC191620	195675	30622	99.62	98.48
c0189B12	1	33	367	394	955	2	111	AC191662	186841	60385	99.17	98.97
b0442J09	1	33	379	407	955	84	177	AC195680	127238	16482	99.68	100
c0273K20	1	33	429	470	955	164	285	AC199626	188609	50260	100	99.87
c0038O12	1	33	456	493	955	233	374	AC206398	180080	4580	92.14	99.72
c0492C24	1	33	489	518	955	360	485	AC191540	180667	39342	99.46	99.59
c0042E10	1	33	518	547	36	17	116	AC197915	187320	62504	99.87	99.58
c0082H20	1	33	538	564	36	85	192	AC206254	176953	4487	99.63	98.7
c0135J05	1	33	566	590	36	163	308	AC206518	164836	50432	99.16	97.79
c0296A03	1	33	587	624	NA	NA	NA	AC234520	231837	34064	98.22	0
c0376C04	1	33	612	646	36	353	501	AC217310	179881	11231	99.49	99.09
c0244O04	1	33	646	678	36	469	569	AC202025	140243	42578	100	99.24
c0112J20	1	33	669	708	NA	NA	NA	AC177939	199395	122828	100	98.28
c0194F20	1	33	680	718	NA	NA	NA	AC200419	169039	84170	97.82	98.95
c0419K15	1	33	704	747	36	637	766	AC191049	199602	80682	99.74	98.07
b0469M04	1	33	728	754	36	730	811	AC211566	130240	11371	98.47	0
b0160H03	1	33	753	776	36	768	865	AC207770	106213	52752	98.72	99.87
b0009E08	1	33	765	800	36	846	944	AC205587	181634	63718	100	99.88
b0475K02	1	33	789	816	36	873	993	AC208575	131114	19768	99.2	99.28
c0065K21	1	33	815	845	36	969	1100	AC199488	177367	22035	99.72	99.52
b0582K19	1	33	839	877	36	1081	1159	AC193364	175751	70455	99.71	99.73
c0057I09	1	33	863	897	36	1120	1239	AC199487	159684	64856	100	97.97
c0122N13	1	33	883	926	36	1201	1322	AC209765	177628	39342	98.82	99.86
b0087G20	1	33	930	950	36	1293	1392	AC205589	118346	29251	99.63	98.82
b0478B01	1	33	948	968	36	1349	1411	AC205819	119903	52890	100	100
c0197B21	1	33	967	997	36	1370	1537	AC206867	182335	55358	99.47	99.75
c0113I06	1	33	987	1014	36	1454	1577	AC205730	124981	37183	99.61	99.44
b0184M20	1	33	1003	1030	NA	NA	NA	AC219093	117540	45796	100	99.87
c0396E19	1	33	1012	1047	36	1565	1656	AC215715	203239	94958	99.37	97.97
b0329I12	1	33	1044	1065	36	1615	1704	AC208723	133554	28427	99.84	99.53
c0132O05	1	33	1053	1091	36	1674	1818	AC195256	173651	2850	99.6	98.94
b0439F07	1	33	1089	1119	1148	63	152	AC186280	135440	38129	99.69	97.51
b0268H06	1	33	1112	1132	1148	0	87	AC196979	125218	1530	97.99	99.32
c0096M05	1	33	1131	1165	NA	NA	NA	AC204374	193313	128631	98.98	98.36
c0487C20	1	33	1156	1194	291	65	181	AC209336	203608	16107	98.18	100
c0460L02	1	33	1192	1227	291	150	288	AC209991	179294	37246	93.84	99.47
c0151H20	1	33	1213	1256	291	263	377	AC212561	186215	38319	99.61	98.62
c0481H11	1	33	1241	1282	291	339	466	AC204517	158204	28562	98.53	93.74
c0142N13	1	33	1278	1320	291	440	566	AC191323	196008	34624	98.83	99.11
c0143C12	1	33	1309	1354	291	543	672	AC177913	238686	20742	99	97.31
c0198I08	1	33	1354	1388	291	657	761	AC191371	168516	8732	99.02	99.85
c0474C21	1	33	1389	1416	291	743	852	AC202879	160550	18849	99.25	99.82
c0401L01	1	33	1425	1446	291	847	931	AC209938	138314	40882	99.65	100
c0323K13	1	33	1436	1475	291	885	1029	AC212040	186171	17568	97	97.8
c0479J10	1	33	1469	1502	291	1009	1117	AC186603	194381	81337	99.87	99.61
c0184C11	1	33	1495	1523	NA	NA	NA	AC194407	164169	Right end	99.78
c0040E11	1	36	0	17	NA	NA	NA	AC191312	76967	36133		99.55
b0599H03	1	36	21	46	995	534	620	AC208477	127687	9673	99.7	99.87
Z_AI-0302C23	1	36	40	60	NA	NA	NA	AC225161	40889	3316	98.13	99.45
c0544M08	1	36	53	78	995	446	537	AC198075	120726	7798	99.49	100
c0282J15	1	36	79	112	995	370	462	AC191380	177425	31973	100	96.94
c0242E03	1	36	102	136	995	271	393	AC204627	180173	85562	98.87	97.93
c0197E10	1	36	127	151	995	214	331	AC214831	179635	52510	98.63	99.3
c0159N03	1	36	143	169	995	133	249	AC213049	186973	9529	0	97.44
c0143G23	1	36	179	209	995	15	129	AC189789	203091	24885	0	98.15
b0381P15	1	36	205	234	39	20	109	AC185603	126105	8746	100	100
b0237M12	1	36	233	255	39	192	292	AC205879	113682	14462	100	99.39
c0307N20	1	36	253	282	39	280	390	AC208225	170090	43046	97.25	99.34
b0293L20	1	36	278	296	39	335	456	AC206167	108744	39942	100	99.76
b0129C23	1	36	287	309	NA	NA	NA	AC217266	109226	51974	100	100
c0188E04	1	36	297	332	39	437	531	AC205693	191913	21936	97.97	99.59
b0339F24	1	36	334	360	597	1892	1991	AC209175	142359	31892	0	0
c0151A03	1	36	363	405	597	1850	1944	AC186236	166383	18400	98.6	99.67
c0021L16	1	36	397	437	597	1758	1878	AC194009	210145	9272	95.95	97.45
c0525L18	1	36	433	473	597	1656	1775	AC199524	176513	40404	98.88	99.63
c0323O12	1	36	487	518	597	1540	1684	AC211184	190186	29978	100	99.3
c0540J12	1	36	550	580	597	1470	1576	AC195581	154792	44799	100	100
c0051C10	1	36	577	618	597	1386	1502	AC190504	187864	33802	99.6	100
b0347O19	1	36	615	641	597	1291	1409	AC195341	154596	44317	99.63	0
b0169A17	1	36	630	653	NA	NA	NA	AC225197	104107	27366	99.81	98.58
c0363N08	1	36	643	677	NA	NA	NA	AC206590	189797	96451	98.47	98.96
c0397A01	1	36	672	679	NA	NA	NA	AC219067	157107	47251	100	99.75
c0324D06	1	36	674	711	597	1057	1169	AC214142	165531	43366	99.75	99.24
b0188J14	1	36	704	728	597	1013	1104	AC205595	128898	9946	99.73	100
Z_AI-0676L14	1	36	723	741	NA	NA	NA	AC225144	39402	29503	98.88	97.61
c0105E01	1	36	736	776	597	928	1007	AC194480	187158	24800	99.86	99.46
b0394A06	1	36	766	790	597	834	912	AC203040	114256	43208	99.8	100
c0005M09	1	36	788	830	597	729	859	AC208445	218382	53636	99.88	99.88
c0547D05	1	36	815	846	597	652	765	AC212878	179369	37330	99.54	98.02
c0107J16	1	36	836	871	597	562	675	AC206999	177564	54189	98.74	0
c0455L14	1	36	865	908	597	471	572	AC210828	204521	85930	99.47	98.84
c0512G12	1	36	903	919	597	393	525	AC197431	221963	38368	98.09	97.75
c0344I09	1	36	914	956	597	266	428	AC186423	209584	10634	99.87	99.25
c0053H24	1	36	956	984	597	128	282	AC194906	181611	7669	98.03	99.43
c0070E10	1	36	982	1015	597	47	163	AC210803	174352	1884	99.68	99.86
b0224F10	1	36	1027	1049	NA	NA	NA	AC217284	137540	57320	99.25	99.88
c0466K09	1	36	1044	1076	841	76	224	AC207389	189632	67634	0	99.46
c0266C03	1	36	1065	1093	841	137	277	AC206182	176079	27604	99.16	99.35
b0645C07	1	36	1090	1125	841	304	393	AC193335	158741	12343	99.74	99.36
b0211D14	1	36	1119	1138	841	478	569	AC198963	109177	55223	99.44	99.01
b0146O06	1	36	1131	1157	841	518	618	AC210044	114146	8071	99.82	100
b0611B08	1	36	1148	1167	NA	NA	NA	AC216888	114979	47017	99.35	100
b0543B23	1	36	1166	1182	841	618	680	AC205972	116839	18708	100	99.51
b0234D04	1	36	1185	1208	NA	NA	NA	AC217286	153400	48088	99.22	99.26
c0347B01	1	36	1210	1253	448	28	128	AC206246	198411	51423	98.12	99.39
c0133J16	1	36	1247	1280	448	68	202	AC195605	179612	34202	98.94	97.59
c0180I04	1	36	1271	1302	448	182	278	AC203000	175372	37365	99.65	99.78
b0501N21	1	36	1294	1327	448	237	346	AC207815	143484	72915	99.87	99.75
c0207G16	1	36	1306	1343	NA	NA	NA	AC225228	225255	73016	97.52	98.77
c0263E11	1	36	1331	1362	448	340	463	AC212976	172900	52446	97.29	98.38
c0529D03	1	36	1354	1403	448	378	523	AC195318	213099	78100	99.48	99.17
c0152A14	1	36	1384	1423	NA	NA	NA	AC186234	177819	90561	98.75	99.34
b0341J24	1	36	1418	1450	448	523	687	AC197044	163330	21736	99.8	0
c0164H01	1	36	1441	1468	NA	NA	NA	AC217559	142833	89621	100	99.78
c0150F17	1	36	1456	1491	448	651	784	AC210840	179728	13867	99.52	99.31
c0146I23	1	36	1486	1522	448	753	866	AC194609	187521	45868	100	99.86
c0393E08	1	36	1543	1574	448	836	976	AC186222	179827	48595	99.47	99.86
c0181C07	1	36	1572	1605	448	922	1032	AC206207	163257	14463	96.24	98.19
c0173L09	1	36	1601	1633	448	987	1151	AC210317	158091	80619	98.94	100
c0474N06	1	36	1618	1659	448	1056	1173	AC210005	191003	93024	97.07	99.84
c0136I11	1	36	1639	1682	NA	NA	NA	AC211460	187351	61440	100	99.89
c0072J04	1	36	1669	1702	448	1191	1320	AC203989	166007	27187	99.12	99.52
b0582N06	1	36	1687	1722	448	1304	1390	AC197472	129367	46366	99.12	97.54
c0233E03	1	36	1708	1747	NA	NA	NA	AC187912	172422	19776	99.26	99.09
b0486J12	1	36	1741	1766	448	1457	1539	AC193489	111175	23299	99.5	99.48
c0318H20	1	36	1760	1798	448	1505	1630	AC199908	178224	23522	99.75	99.62
c0099H23	1	36	1791	1824	448	1601	1743	AC209815	174065	145908	99.16	99
c0538F19	1	36	1814	1843	NA	NA	NA	AC211571	167694	17025	99.88	99.6
c0116B06	1	36	1841	1877	448	1754	1855	AC196030	157750	35226	99.52	99.58
c0210O17	1	36	1878	1904	448	1828	1945	AC186630	170341	Right end	99.28
b0464M11	1	37	0	20	NA	NA	NA	AC189052	141302	36411		98.63
b0616F05	1	37	23	42	38	47	150	AC204824	193676	35423	99.74	99.52
b0529C23	1	37	30	56	38	135	234	AC210234	158483	126615	99.82	99.74
c0261B07	1	37	37	73	38	137	224	AC205800	169277	46220	98.2	98.59
b0640G12	1	37	68	100	38	199	307	AC216194	146923	30038	99.88	99.6
c0171K09	1	37	75	123	38	274	390	AC203047	178803	74176	99.88	99.65
c0455M15	1	37	118	157	38	384	485	AC196679	175521	18979	99.57	99.32
b0592D02	1	37	149	190	38	466	560	AC191428	156469	12753	98.82	99.59
c0127I16	1	37	187	220	38	547	665	AC196435	197130	36362	98.5	99.87
c0013P07	1	37	215	248	38	637	758	AC212328	215595	76266	94.59	0
c0052C11	1	37	232	273	38	712	847	AC201795	174761	26849	99.88	97.08
c0214G13	1	37	255	301	38	779	925	AC193937	207507	45727	100	98.4
c0355K08	1	37	293	329	38	909	1057	AC186320	185460	54349	99.54	98.07
c0140I05	1	37	331	367	NA	NA	NA	AC194452	187101	31929	97.11	100
c0052C12	1	37	355	393	38	1106	1207	AC204610	160342	44864	99.19	99.86
b0117P05	1	37	384	403	NA	NA	NA	AC217361	137079	45588	99.67	100
c0100F14	1	37	394	430	38	1242	1353	AC212323	187899	39337	99.75	99.64
c0408I08	1	37	425	457	38	1316	1446	AC197435	170960	85480	99.29	99.56
c0226G16	1	37	441	483	38	1368	1502	AC177817	207056	74704	99.23	99.66
c0125M18	1	37	466	502	38	1453	1537	AC191017	174264	2564	98.7	99.49
b0135G22	1	37	503	524	38	1600	1691	AC202158	138276	30460	99.27	100
c0163C17	1	37	517	543	NA	NA	NA	AC214366	175080	76080	99.58	99.55
c0008J18	1	37	532	570	38	1722	1834	AC200654	187541	29830	98.68	98.82
c0198P18	1	37	550	585	38	1785	1932	AC195785	172910	25644	0	99.04
c0251L03	1	37	595	632	38	1894	2028	AC186524	171553	10703	100	98
c0282D10	1	37	633	656	361	136	234	AC193657	171971	3375	99.53	99.49
c0548O04	1	37	656	677	37	41	132	AC195059	140098	36634	99.87	100
c0126K08	1	37	682	708	37	102	231	AC186783	208061	40085	99.51	0
c0282F17	1	37	703	732	37	185	300	AC194884	138558	25368	99.13	99.24
c0072I17	1	37	745	775	37	276	361	AC196957	177976	49224	99.11	98.87
c0148A12	1	37	766	799	37	333	438	AC186235	168745	24150	0	100
c0410A14	1	37	792	828	37	409	513	AC213369	148238	37868	95.87	99.69
b0637K04	1	37	814	852	37	480	600	AC205781	151019	17048	99.75	100
c0319G07	1	37	864	895	37	562	686	AC211182	184994	61201	99.11	96.9
b0295N23	1	37	892	914	37	661	762	AC208691	115654	5788	98.99	100
c0175C13	1	37	902	944	37	751	869	AC195374	171133	70219	100	100
c0476C02	1	37	927	965	37	842	946	AC186606	170490	29093	99.85	0
c0026J02	1	37	954	984	37	935	1024	AC195229	154825	48937	100	96.3
c0452F15	1	37	972	1005	37	988	1085	AC207666	171941	32087	92.59	99.48
b0016K19	1	37	1006	1031	37	1065	1159	AC209030	153655	40041	99.87	100
c0543A22	1	37	1027	1051	37	1126	1221	AC210429	153506	61845	100	99.39
c0007O14	1	37	1045	1065	NA	NA	NA	AC233867	147978	28762	94.77	99.51
b0335P14	1	37	1062	1083	37	1245	1337	AC204555	127761	41579	99.12	99.48
c0180J22	1	37	1089	1123	37	1300	1427	AC186228	182093	19881	99.62	97.82
b0643C24	1	37	1113	1142	37	1402	1510	AC192264	127767	58068	99.56	100
c0331N11	1	37	1131	1170	37	1473	1565	AC194176	203300	94929	0	97.85
c0179F04	1	37	1156	1186	37	1539	1626	AC186331	176337	Right end	100
c0285N16	1	38	0	25	40	1249	1340	AC187262	182931	13276		100
c0289I14	1	38	35	59	40	1184	1254	AC213779	181714	66998	97.39	92.17
c0321P18	1	38	61	94	40	1078	1205	AC213670	196551	112722	99.73	99.76
c0116L15	1	38	70	111	NA	NA	NA	AC214801	181683	47671	0	0
c0514D06	1	38	83	124	40	1006	1123	AC211196	173441	38773	98.46	0
b0573D05	1	38	110	136	40	950	1033	AC202140	123331	25378	99.55	99.05
b0594A17	1	38	131	161	40	897	988	AC194380	142855	39677	99.85	100
c0255E06	1	38	167	209	40	803	896	AC186744	167515	18203	99.54	99.12
c0412H03	1	38	192	225	40	739	826	AC197432	139932	28244	99.55	99.88
c0004F08	1	38	227	266	40	604	751	AC213833	259466	80854	99.73	96.07
c0448A20	1	38	254	283	40	563	683	AC213641	150979	25557	98.96	99.59
c0039O11	1	38	278	316	40	463	577	AC190935	205578	48339	0	99.28
c0145M17	1	38	299	333	40	411	502	AC212013	172606	119399	97.36	99.72
b0287L06	1	38	318	346	40	417	468	AC201964	132871	31088	99.03	97.69
c0382H21	1	38	335	377	40	347	429	AC186416	175389	23121	99.51	100
c0274G08	1	38	375	413	40	259	371	AC194285	193220	114155	97.21	99.15
c0240I05	1	38	395	424	40	198	300	AC215187	186309	27967	98.55	100
c0163O08	1	38	417	452	40	117	228	AC205695	154829	77886	99.22	99.75
b0236A10	1	38	432	461	40	97	186	AC208564	136767	30117	100	100
c0231H19	1	38	454	485	40	40	129	AC211582	173396	105450	99.86	94.78
c0354N07	1	38	460	486	40	0	87	AC196077	170155	114410	99.65	0
c0180G21	1	38	481	506	NA	NA	NA	AC216189	131809	78719	98.63	99.67
c0153H15	1	38	487	520	1075	0	122	AC211887	178587	88328	98.73	100
c0243P11	1	38	502	541	1075	34	159	AC186625	212897	38223	99.26	99.7
c0112O12	1	38	550	570	NA	NA	NA	AC213857	162461	81993	98.75	99.39
c0423B06	1	38	565	606	41	390	488	AC212463	164080	22259	99.6	99.74
c0158E21	1	38	601	635	NA	NA	NA	AC215676	179724	58380	99.29	93.23
c0399I08	1	38	628	665	41	165	306	AC194634	171498	1085	99.61	98.25
c0192F17	1	38	659	707	41	82	191	AC186300	173156	8479	98.45	99.7
b0326B09	1	38	703	725	41	0	127	AC196953	109440	32040	97.53	98.34
b0006H02	1	38	720	729	NA	NA	NA	AC202128	64319	61040	97.96	97.85
b0523C19	1	38	721	748	NA	NA	NA	AC234203	157420	35228	0	98.72
c0105A16	1	38	751	783	NA	NA	NA	AC225886	169293	118270	99.88	99.49
c0461C11	1	38	764	799	42	108	247	AC205546	201892	22966	99.31	100
c0539E08	1	38	788	821	42	204	314	AC203826	164767	27406	0	0
c0312H02	1	38	813	854	42	311	431	AC197908	191835	4866	99.75	99.58
c0547A13	1	38	856	882	42	417	528	AC203827	158299	37469	98.86	99.5
c0294A07	1	38	881	913	42	469	567	AC202949	160646	75278	99.32	100
b0286E17	1	38	909	939	42	534	624	AC208689	136427	12545	99.1	100
c0340K17	1	38	937	974	42	602	771	AC214520	225135	19405	99.77	99.72
c0120F20	1	38	961	994	42	750	894	AC186691	236032	29244	99.55	99.6
c0265I18	1	38	1002	1029	42	852	962	AC204054	156594	12300	99.08	97.83
c0336F17	1	38	1032	1063	42	959	1110	AC207471	135897	28132	99.62	99.63
c0065O09	1	38	1059	1091	NA	NA	NA	AC225558	170954	96823	99.4	0
b0108C07	1	38	1075	1098	42	1087	1184	AC205602	115768	35656	100	100
c0321I16	1	38	1094	1132	42	1140	1237	AC204042	169401	17600	99.43	99.27
c0327J22	1	38	1124	1152	42	1275	1414	AC194172	188739	53605	100	99.74
c0388H06	1	38	1153	1197	NA	NA	NA	AC215610	239834	62230	99.48	99.37
c0239P24	1	38	1182	1221	42	1558	1685	AC205986	165554	29407	99.61	100
c0026A18	1	38	1217	1255	42	1635	1752	AC208531	147778	18085	100	99.87
c0102K22	1	38	1253	1291	42	1755	1836	AC196281	172455	Right end	98.54
b0572N07	1	39	0	29	43	7	108	AC185585	113522	26107		97.87
b0154P09	1	39	25	51	43	88	196	AC208682	150004	8566	99.58	99.7
c0093N18	1	39	47	77	43	192	315	AC196267	179326	51395	0	100
c0085J19	1	39	65	103	43	269	392	AC191077	190381	10635	100	98.37
Z_AI-0519M18	1	39	86	113	NA	NA	NA	AC225154	45450	9428	98.51	99.61
b0121I18	1	39	108	124	43	393	505	AC207464	136469	12678	100	99.86
b0396P12	1	39	131	159	43	468	578	AC208125	164396	106508	99.38	99.86
c0056A17	1	39	136	165	NA	NA	NA	AC219149	174438	44539	99.45	98.81
c0493K11	1	39	150	190	43	596	701	AC195674	202811	72779	99.71	94.83
b0104H11	1	39	185	212	43	760	829	AC190868	138151	3216	98.86	100	AC155370
c0006H15	1	39	215	249	43	811	927	AC197246	188687	14775	100	99.72
c0403J13	1	39	245	276	43	906	1011	AC202861	172045	62653	98.03	98.96
c0055D18	1	39	269	302	43	972	1086	AC212446	184221	42256	94.56	97.29
b0279D16	1	39	294	316	NA	NA	NA	AC219098	178039	97924	100	99.7
b0196O09	1	39	307	336	1131	91	160	AC187835	130675	Right end	99.6
b0212K12	1	40	1	29	44	1023	1092	AC195933	119725	74055		99.88
b0088L07	1	40	14	40	44	1032	1102	AC200533	127139	40502	99.88	99.86
b0159K20	1	40	31	51	NA	NA	NA	AC231406	125667	27104	100	99.77
c0010K03	1	40	42	67	44	920	1008	AC207619	155551	7886	99.77	99.51
c0529J23	1	40	65	107	44	808	928	AC210523	203847	55749	100	98.16
c0107L20	1	40	108	147	NA	NA	NA	AC231378	177979	20953	95.84	98.08
c0026M15	1	40	139	175	44	623	722	AC213630	170168	54195	98.99	98.38
b0623L15	1	40	163	189	44	590	666	AC209407	113561	24121	99.45	98.89
c0351H01	1	40	181	208	44	538	627	AC213524	149356	89555	99.46	99.06
b0368N04	1	40	189	216	44	496	594	AC205785	163700	11945	99.84	99.87
c0020M22	1	40	221	253	44	389	524	AC216732	220628	30317	99.87	99.48
c0039K12	1	40	254	278	44	304	415	AC215230	181332	58277	100	99.88
b0415N18	1	40	267	295	44	224	324	AC185528	157243	8463	100	100
b0132O13	1	40	302	325	44	155	255	AC208679	111789	65398	100	99.45
c0117L03	1	40	313	345	44	101	209	AC212247	176109	57397	100	98.77
b0073L01	1	40	339	367	44	0	165	AC187210	143437	Right end	100
b0203L03	1	41	0	24	45	37	152	AC189047	181533	75234		0
c0015L07	1	41	13	41	45	102	237	AC197129	234235	100544	100	99.75
b0292F02	1	41	37	61	NA	NA	NA	AC217235	132211	18181	99.11	100
b0581C17	1	41	60	87	45	242	315	AC205814	127789	53442	99.76	100
b0226M08	1	41	75	96	45	264	346	AC205878	115782	46673	99.62	99.49
c0292P11	1	41	82	108	45	356	471	AC214041	195228	54201	98.85	92.05
c0240J06	1	41	102	132	45	480	597	AC211973	186241	33922	99.58	99.62
c0157N16	1	41	129	161	45	542	699	AC209698	142202	95543	99.74	99.24
b0187C19	1	41	150	164	NA	NA	NA	AC217147	117630	22894	98.83	98.34
b0185E06	1	41	158	179	NA	NA	NA	AC217240	121620	92132	99.3	99.88
b0434D03	1	41	170	193	45	663	767	AC195846	124186	35589	98.84	99.71
c0297N07	1	41	181	216	45	722	847	AC213671	176342	150746	99.61	99.87
c0038I19	1	41	191	231	NA	NA	NA	AC194272	216444	38067	99.73	99.46
c0078C16	1	41	216	249	45	823	957	AC200494	171880	24424	99.34	99.86
b0377F10	1	41	244	271	45	973	1059	AC198859	138362	97052	97.93	99.58
c0068B05	1	41	258	299	45	938	1108	AC191020	200775	59579	99.62	98.67
c0264H13	1	41	286	312	NA	NA	NA	AC198897	181673	62618	96.32	97.85
c0074K17	1	41	303	328	45	1116	1222	AC214762	204768	88785	99.57	96.39
c0407D04	1	41	317	346	45	1146	1264	AC209944	199810	5953	98.69	99.46
c0123K11	1	41	349	378	45	1261	1356	AC206989	160379	50900	100	97.09
c0166L05	1	41	365	405	45	1340	1452	AC207351	178145	11836	99.74	97.67
c0279P04	1	41	422	458	45	1438	1554	AC208026	184167	2098	90.43	98.93
c0464D10	1	41	453	494	45	1552	1671	AC206657	194195	51360	0	0
b0135C08	1	41	479	513	NA	NA	NA	AC232316	149816	74944	99.05	99.87
c0028N10	1	41	498	532	45	1693	1799	AC216253	181941	64186	98.45	99.85
b0605H09	1	41	523	550	45	1793	1891	AC208712	160582	49543	99.87	0
c0273N21	1	41	540	570	45	1842	1954	AC205896	134546	68898	99.3	98.99
b0117G10	1	41	550	567	NA	NA	NA	AC217260	150729	15856	0	100
c0142G16	1	41	572	607	NA	NA	NA	AC206030	173091	44855	99.87	99.66
c0234N22	1	41	598	637	45	2038	2170	AC211149	194619	20210	98.92	99.37
b0430J08	1	41	632	655	45	2192	2298	AC197067	140617	14304	0	97.12
c0373M20	1	41	652	690	45	2368	2509	AC186224	211841	59582	99.35	99.39
c0082I04	1	41	685	714	45	2443	2527	AC192237	154455	26187	99.74	99.31
b0240I18	1	41	715	738	45	2511	2605	AC203363	135864	33814	99.61	99.77
b0332A09	1	41	730	763	45	2572	2683	AC208044	127008	26643	100	99.49
b0627P01	1	41	757	785	45	2638	2729	AC213688	131454	7629	100	100
c0120D02	1	41	782	820	NA	NA	NA	AC210532	214313	130658	97.08	99.74
c0134A18	1	41	803	834	45	2772	2885	AC186190	174970	22843	99.63	99.71
c0479A09	1	41	833	862	45	2860	2946	AC203789	143623	10444	100	99.75
c0209G12	1	41	861	892	45	2928	3058	AC211939	168038	38306	99.61	98.56
c0017I10	1	41	879	918	45	3029	3148	AC205571	235367	82571	100	99.66
c0093D07	1	41	917	954	NA	NA	NA	AC203301	165203	49225	99.86	99.87
c0274B21	1	41	955	1001	45	3164	3304	AC197487	229828	48442	99.74	99.29
c0070O19	1	41	980	1010	45	3268	3378	AC211173	183525	67889	100	99.38
c0237B06	1	41	999	1045	45	3346	3466	AC206031	210250	516	100	100
b0045G23	1	41	1060	1083	NA	NA	NA	AC202928	138355	51716	100	99.33
b0188E10	1	41	1079	1104	NA	NA	NA	AC218900	145252	78194	98.46	99.47
b0120G14	1	41	1089	1107	1073	23	125	AC198073	127725	30844	99.01	100
c0198C21	1	41	1105	1145	1073	95	228	AC186304	195279	3517	99.25	96.26
b0012G12	1	41	1145	1159	NA	NA	NA	AC231602	110822	27021	99.73	93.16
c0490M05	1	41	1150	1174	634	67	199	AC211752	153525	29551	0	99.73
c0322O05	1	41	1163	1206	634	178	262	AC212039	137451	56528	99.37	99.88
c0287B19	1	41	1191	1232	634	230	353	AC209845	203003	66439	100	99.86
b0293H10	1	41	1221	1240	NA	NA	NA	AC214225	110873	14982	99.84	99.85
c0219K14	1	41	1235	1264	46	13	128	AC193997	186025	46794	98.88	100
c0272L21	1	41	1258	1294	46	100	230	AC189066	202647	25326	99.76	99.73
b0540N20	1	41	1286	1313	46	211	272	AC194946	147092	43426	99.48	100
c0466N06	1	41	1307	1339	46	243	358	AC200554	171461	29287	98.81	99.87
b0505K17	1	41	1337	1365	46	329	433	AC205818	142709	38742	99.6	99.65
c0109L23	1	41	1349	1390	46	400	511	AC206997	171332	50505	97.88	99.64
b0226H09	1	41	1387	1417	46	474	561	AC205655	122484	32133	99.88	100
c0124A04	1	41	1405	1436	NA	NA	NA	AC200568	166117	12105	99.88	99.65
c0005C22	1	41	1437	1474	46	615	747	AC194598	207889	57879	99.7	99.43
c0522M11	1	41	1466	1500	NA	NA	NA	AC217354	195998	46515	99.86	97.93
b0144D11	1	41	1495	1527	46	803	926	AC205599	169895	84106	100	93.68
c0534E11	1	41	1513	1538	46	870	967	AC210610	166879	77996	99.17	99.35
c0242F06	1	41	1532	1561	NA	NA	NA	AC217669	175069	65062	100	99.48
c0133H20	1	41	1549	1583	46	944	1111	AC198871	172645	5144	99.78	98.86
c0276O18	1	41	1568	1589	NA	NA	NA	AC192608	108241	98458	99.86	99.15
c0250M23	1	41	1598	1624	NA	NA	NA	AC198212	122464	113369	100	99.76
c0152E17	1	41	1606	1627	46	1078	1165	AC186231	115229	Right end	99.87
b0552A13	1	42	2	24	NA	NA	NA	AC185587	135275	47912		99.85
c0117G14	1	42	31	53	48	856	973	AC206527	155916	29213	98.62	99.67
c0211E20	1	42	57	87	48	765	894	AC215309	182436	14075	0	99.72
b0026G14	1	42	83	112	48	685	791	AC196638	122623	44903	98.55	97.31
c0040O19	1	42	104	140	48	604	722	AC177830	197475	53327	99.76	99.74
c0046G15	1	42	135	166	48	531	637	AC206176	183593	56038	100	93.6
c0392G24	1	42	165	192	48	507	587	AC209929	126119	5263	99.71	99.02
c0379C01	1	42	188	215	48	378	481	AC199189	164117	11541	99.7	99.87
c0338P05	1	42	216	250	48	259	385	AC192204	169336	57837	100	99.51
b0495O23	1	42	241	265	NA	NA	NA	AC234528	151368	82784	94.9	97.53
c0219K23	1	42	252	279	48	164	273	AC209715	128657	13406	98.51	99.59
c0271K12	1	42	271	310	48	76	185	AC208434	166341	67820	99.86	99.72
b0146F01	1	42	302	327	48	0	104	AC185514	159213	Right end	100
c0182D04	1	43	5	41	49	1295	1401	AC186299	200527	60598		99.74
b0413D19	1	43	29	57	49	1241	1340	AC208702	166403	34117	99.86	99.55
c0327H14	1	43	70	111	49	1170	1272	AC194169	179999	8177	98.52	96.81
c0272B24	1	43	91	136	49	1052	1194	AC208644	208632	71533	99.73	100
c0163L24	1	43	123	161	49	986	1100	AC212244	174681	73521	98.73	98.02
c0418O21	1	43	146	175	49	928	1080	AC200299	164389	62494	99.09	99.59
c0028C24	1	43	163	196	49	843	996	AC194264	189605	46457	100	98.67
b0443E15	1	43	183	218	NA	NA	NA	AC216887	132377	70543	98.31	0
c0313E01	1	43	198	230	49	736	854	AC206955	159444	9081	99.44	100
b0121E12	1	43	225	248	49	637	742	AC190545	157135	30916	99.49	99.62
c0237H01	1	43	253	292	49	519	662	AC177819	206850	12272	99.44	98.71
c0447E13	1	43	293	328	49	407	530	AC196404	199693	19928	98.05	99.6
c0308J07	1	43	327	358	49	293	439	AC202011	163886	46094	99.62	99.86
c0135N17	1	43	349	383	49	229	359	AC205379	187908	35351	99.87	100
c0461G07	1	43	381	406	49	170	267	AC211230	165246	84673	98.47	98.93
c0542N16	1	43	393	422	NA	NA	NA	AC211637	155631	25630	99.87	99.46
b0283P08	1	43	410	443	49	88	146	AC185611	144685	50745	93.56	99.58
c0155M10	1	43	431	465	49	15	123	AC215269	196558	10131	99.57	99.24
c0452C08	1	43	472	500	NA	NA	NA	AC205545	166649	104173	100	99.88
c0087C11	1	43	492	517	50	29	117	AC202953	153510	26636	99.77	98.99
c0263J17	1	43	511	550	50	104	234	AC197253	193809	50326	99.75	99.72
c0264P07	1	43	538	582	50	199	286	AC186619	185670	7831	98.9	99.86
c0042P07	1	43	581	613	50	288	393	AC212710	155328	24294	99.59	100
b0524J20	1	43	616	635	50	385	453	AC197220	101899	3609	99.75	100
c0215N18	1	43	651	685	50	458	589	AC195794	171056	31724	99.87	98.75
b0626I18	1	43	668	689	50	564	647	AC189051	123384	Right end	99.54
b0339C10	1	44	3	33	51	36	142	AC188025	134648	18017		91.91
b0607F04	1	44	27	55	51	126	228	AC205461	159388	45096	98.65	97.91
b0232F16	1	44	45	68	51	174	281	AC205771	138207	28106	100	99.87
c0386A06	1	44	62	91	51	247	364	AC214290	182806	8929	99.42	99.18
c0008P21	1	44	85	128	51	374	522	AC206430	200872	12291	99.75	99.64
c0241O02	1	44	126	161	51	461	580	AC208421	149142	12381	95.72	99.83
c0548A09	1	44	160	188	51	592	695	AC196145	160805	7060	100	98.4
c0423P02	1	44	191	222	NA	NA	NA	AC204291	148235	47174	100	99.75
c0544I01	1	44	224	255	51	738	847	AC212079	150250	88100	99.08	98.94
c0257C20	1	44	242	279	NA	NA	NA	AC222564	179628	35022	100	99.85
c0082M16	1	44	253	298	51	919	1042	AC205716	167598	42868	98.06	100
b0138M14	1	44	307	328	51	1008	1099	AC185513	144570	42774	99.75	98.22
c0461G19	1	44	325	351	NA	NA	NA	AC217908	203220	26623	98.18	98.1
c0135A04	1	44	347	380	47	74	214	AC190956	182259	21577	99.6	99.52
c0153F24	1	44	370	395	47	191	334	AC198870	197608	102770	97.41	98.29
c0086M20	1	44	382	413	47	241	376	AC191088	193697	60812	99.12	98.37
c0139H04	1	44	404	448	NA	NA	NA	AC177916	191219	22584	99.88	99.87
Z_AI-0725F11	1	44	423	448	NA	NA	NA	AC219177	33167	4410	99.17	98.78
b0605C24	1	44	443	470	47	436	568	AC190531	143341	36221	98.93	99.71
b0108C13	1	44	466	486	NA	NA	NA	AC225805	142514	93048	99.4	100
c0147A16	1	44	475	501	47	559	662	AC196490	183261	56699	97.41	99.65
c0452L15	1	44	502	534	47	623	750	AC213529	201639	45006	99.75	99.88
b0329E17	1	44	526	552	47	723	835	AC207535	118538	2437	99.43	99.16
c0024E04	1	44	555	591	47	867	964	AC194595	187993	53891	99.86	99.01
c0463O12	1	44	582	619	47	920	1031	AC213845	223595	11542	99.49	98.36
c0028O21	1	44	619	658	47	1019	1145	AC201804	161184	23950	99.68	100
b0215G03	1	44	653	673	47	1089	1190	AC192361	139894	18509	99.07	99.75
c0418J02	1	44	681	719	NA	NA	NA	AC186322	156067	88123	100	99.75
b0153D17	1	44	716	740	590	2851	2953	AC192360	161794	27239	99.69	97.09
c0568E08	1	44	730	769	590	2772	2878	AC197689	153311	55497	100	99.83
c0415C22	1	44	764	794	NA	NA	NA	AC217120	167638	5500	100	97.72
c0103L22	1	44	789	828	590	2603	2715	AC203338	164845	3770	100	99.66
b0325E24	1	44	827	856	NA	NA	NA	AC195163	165138	49795	99.09	99.73
b0349I04	1	44	850	890	590	2416	2526	AC186328	160916	20260	100	100
b0322K14	1	44	883	920	590	2327	2422	AC195161	140488	22455	99.16	99.73
b0498M13	1	44	911	941	590	2247	2336	AC201877	153577	28386	99.7	99.87
c0461G13	1	44	934	967	NA	NA	NA	AC218012	164432	55123	99.44	99.14
c0448K22	1	44	976	1009	NA	NA	NA	AC231542	165352	74936	99.45	99.58
c0514A03	1	44	994	1023	590	2072	2166	AC202563	142137	64484	99.87	100
b0189D05	1	44	1010	1040	NA	NA	NA	AC195948	147447	65448	99.71	98.75
b0186D07	1	44	1024	1045	NA	NA	NA	AC216818	121309	7146	99.42	98.77
c0117F22	1	44	1042	1082	590	1858	1996	AC205731	151853	21863	98.83	99.74
c0158N24	1	44	1077	1114	590	1769	1908	AC215279	210125	38363	99.05	99.48
c0545E08	1	44	1102	1134	590	1701	1795	AC210836	139064	24944	99.21	99.31
c0307B13	1	44	1145	1174	590	1617	1738	AC201783	161113	50816	99.88	100
b0207F22	1	44	1171	1200	590	1554	1641	AC193316	197952	79114	0	99.69
c0265K14	1	44	1183	1214	590	1477	1580	AC206307	209556	40394	99.77	99.88
c0026I08	1	44	1210	1246	590	1397	1510	AC213629	178079	42030	98.75	99.88
b0511C22	1	44	1235	1265	590	1329	1431	AC205970	110962	62448	99.76	99.74
c0179I06	1	44	1247	1282	NA	NA	NA	AC218173	155727	64422	99.86	0
b0390O08	1	44	1269	1301	590	1219	1309	AC204624	140778	16765	100	99.78
c0135L18	1	44	1295	1326	590	1117	1258	AC194459	177739	40095	96.12	99.46
c0192B09	1	44	1333	1360	590	1068	1163	AC186226	159282	13967	99.59	98.72
b0642P18	1	44	1358	1385	590	969	1070	AC192263	156403	60728	100	99.12
c0137G23	1	44	1380	1418	590	870	973	AC197380	202957	23275	96.79	99.85
c0046G05	1	44	1406	1437	590	777	921	AC217050	194970	32775	99.58	99.76
c0297B19	1	44	1430	1461	590	719	822	AC203090	124542	14984	99.87	99.87
b0249J18	1	44	1454	1474	NA	NA	NA	AC217376	117052	35450	99.55	99.81
b0526H06	1	44	1473	1500	590	622	701	AC209338	144044	14171	99.85	100
c0265A20	1	44	1501	1535	590	528	648	AC186617	180429	20849	99.73	98.64
b0176G20	1	44	1531	1555	590	444	555	AC193971	142534	3151	0	0
c0112F01	1	44	1555	1583	590	362	475	AC199826	145790	22187	99.46	97.27
c0317A14	1	44	1575	1606	590	261	371	AC210812	189043	17576	99.52	99.55
c0398F13	1	44	1603	1630	590	154	276	AC207119	151082	16317	100	99.87
c0301A05	1	44	1627	1653	590	63	190	AC205791	113088	75602	99.3	98.2
b0276G06	1	44	1644	1666	NA	NA	NA	AC216875	116769	11883	98.58	99.84
c0043H24	1	44	1669	1695	1058	110	210	AC205350	180768	80592	99.1	98.39
c0140K22	1	44	1686	1720	NA	NA	NA	AC218176	195849	47059	99.43	99.49
c0040B09	1	44	1712	1741	NA	NA	NA	AC217502	171064	119779	99.44	99.01
c0109E02	1	44	1737	1768	NA	NA	NA	AC217567	162975	26920	99.01	99.74
b0340C14	1	44	1760	1787	641	66	228	AC205966	126338	47417	99.88	99.74
c0129D24	1	44	1781	1809	641	156	275	AC207872	162925	16821	99.88	98.87
c0271I04	1	44	1807	1844	NA	NA	NA	AC194868	191702	36888	98.84	100
c0151N13	1	44	1834	1868	641	356	464	AC186665	176271	12345	99.61	99.62
c0067L04	1	44	1885	1922	641	435	568	AC199074	176790	36638	100	99.87
c0490H13	1	44	1913	1951	NA	NA	NA	AC217910	187166	46860	98.95	98.71
c0276N04	1	44	1943	1974	NA	NA	NA	AC217555	143157	112142	99.46	99.14
c0029F17	1	44	1948	1982	NA	NA	NA	AC202963	161946	31413	99.51	99.87
c0255G06	1	44	1976	2017	NA	NA	NA	AC200881	185257	136099	99.3	99.87
c0342G15	1	44	1985	2022	641	738	868	AC196976	189170	57782	100	99.58
c0308H11	1	44	2011	2043	641	817	951	AC203056	151518	28889	99.68	100
c0207K11	1	44	2034	2069	641	921	1028	AC206781	169818	84467	100	98.96
c0506F03	1	44	2050	2092	NA	NA	NA	AC231543	168008	58566	99.42	99.73
c0456C15	1	44	2088	2126	641	1037	1129	AC215802	165421	32048	99.88	99.68
c0309B03	1	44	2112	2153	641	1170	1303	AC198362	175633	16441	96.1	98.78
c0219E01	1	44	2146	2188	641	1291	1413	AC186528	181809	29714	99.43	98.68
b0197C02	1	44	2189	2216	NA	NA	NA	AC195183	136838	14499	97.63	96.82
c0135J20	1	44	2223	2252	687	1926	2062	AC202448	146119	30212	99.74	98.82
c0197D13	1	44	2243	2276	687	1829	1995	AC214476	202218	61306	99.54	97.09
c0478A06	1	44	2267	2306	687	1771	1899	AC210006	202095	10705	99.69	98.73
c0017F09	1	44	2306	2340	687	1662	1786	AC205372	184994	28912	99.88	99.74
c0434P13	1	44	2334	2365	687	1555	1694	AC209968	171225	18293	96.34	99.47
b0122A09	1	44	2369	2397	687	1480	1624	AC205600	147335	37023	99.88	100
c0261I14	1	44	2382	2427	687	1381	1535	AC208429	183462	19549	98.8	98.96
Z_AI-0525N18	1	44	2406	2436	NA	NA	NA	AC219171	30721	5392	98.8	97.33
c0226C21	1	44	2431	2462	687	1232	1345	AC206198	178094	68533	100	100
c0118E22	1	44	2446	2478	687	1191	1301	AC194473	178004	43400	99.87	99.88
c0292P07	1	44	2476	2513	687	1097	1233	AC186683	200396	43057	100	99.77
b0341K13	1	44	2506	2543	NA	NA	NA	AC195152	193256	15210	99.68	99.62
c0171P22	1	44	2541	2579	687	917	1030	AC200754	172312	10950	99.59	99.88
c0298K10	1	44	2576	2611	687	804	959	AC208794	185871	50354	96.76	99.56
b0028C22	1	44	2601	2621	NA	NA	NA	AC217977	126561	24870	97.76	96.32
b0183N15	1	44	2620	2647	687	699	787	AC204267	119331	16986	99.12	99.26
c0179A17	1	44	2638	2675	687	586	694	AC186227	188474	2321	99.62	99.71
b0142L19	1	44	2689	2718	687	537	621	AC197012	123475	28617	99.35	99.84
c0236L20	1	44	2711	2748	687	455	569	AC200883	172741	99110	99.87	98.46
c0389N11	1	44	2740	2752	NA	NA	NA	AC217638	173132	57905	96.91	96.43
c0030O08	1	44	2747	2784	687	334	448	AC205981	176509	46288	93.13	98.9
b0123H03	1	44	2773	2816	687	262	368	AC187217	176864	4283	99.49	98.53
c0523C23	1	44	2814	2846	NA	NA	NA	AC209218	183773	25114	97.94	97.36
b0625A16	1	44	2843	2876	NA	NA	NA	AC217423	149397	23882	99.72	99.6
b0505J10	1	44	2873	2893	687	12	89	AC185592	120744	Right end	98.74
b0597D08	1	45	0	32	53	666	734	AC194626	77968	26132		99.34
c0109H18	1	45	30	60	53	569	688	AC202132	162367	75600	99.35	0
c0188C22	1	45	44	78	53	524	632	AC195782	176799	7510	99.86	98.12
c0045O24	1	45	76	118	53	425	543	AC177835	204194	52259	95.14	99.42
c0291J03	1	45	116	145	53	342	463	AC195588	173861	90041	100	98.14
c0262J12	1	45	137	165	NA	NA	NA	AC204416	129972	25190	96.37	99.35
c0271J04	1	45	158	197	53	221	353	AC208433	206448	40853	99.58	97.48
c0108L14	1	45	197	230	53	138	253	AC211275	160357	36794	98.68	99.76
c0154C18	1	45	227	259	53	1	170	AC213998	173469	11310	0	0
b0257F19	1	45	258	280	NA	NA	NA	AC226209	123463	105547	98.81	98.81
c0488K11	1	45	258	293	1112	25	148	AC197479	160471	Right end	100
b0638J02	1	46	0	30	54	18	131	AC194400	130875	391		98.96
c0375B06	1	46	29	57	NA	NA	NA	AC203382	134684	17884	99.49	99.21
c0297O12	1	46	51	85	54	171	318	AC209805	187674	28710	0	98.76
c0201I15	1	46	78	115	54	297	421	AC210173	167527	54690	100	100
c0103J24	1	46	99	132	54	364	499	AC205734	169538	69592	99.87	98.85
c0260E13	1	46	122	154	54	463	607	AC215242	201321	67220	99	99.82
c0496F15	1	46	150	186	NA	NA	NA	AC207069	192594	90885	98.64	0
c0137O03	1	46	163	196	54	596	696	AC195604	154936	8249	99.85	99.7
b0008G20	1	46	195	218	54	692	752	AC200683	124640	4132	100	99.67
c0220A09	1	46	210	257	54	731	886	AC212023	190290	66057	99.72	99.67
c0244K22	1	46	252	290	54	815	921	AC208024	182970	3374	98.85	99.74
c0128B15	1	46	284	318	54	902	1002	AC202451	167395	27270	100	99.47
c0391L06	1	46	313	346	54	984	1101	AC194110	150203	55863	0	99.87
c0217H09	1	46	327	366	54	1040	1148	AC186305	180668	118918	99.48	99.11
c0288O13	1	46	347	371	54	1080	1154	AC198650	126375	21485	100	100
c0291F08	1	46	372	406	54	1152	1270	AC192602	208207	142750	98.58	99.86
c0043K23	1	46	378	406	NA	NA	NA	AC214499	188539	103048	98.69	99.04
c0310L20	1	46	387	424	NA	NA	NA	AC210969	173030	151220	99.87	99.45
c0072D18	1	46	389	425	54	1195	1319	AC191044	197663	114509	99.62	93.6
b0627J05	1	46	402	433	NA	NA	NA	AC201874	140047	74237	98.15	98.11
c0243H04	1	46	411	442	NA	NA	NA	AC217557	179189	92639	0	99.87
b0334O16	1	46	433	445	54	1376	1452	AC208698	132743	67541	99.49	99.38
c0010K06	1	46	443	476	54	1379	1544	AC208605	217798	44081	99.71	97.39
c0154A09	1	46	470	490	NA	NA	NA	AC233856	195373	104347	98.74	98.29
c0098O02	1	46	485	507	NA	NA	NA	AC213521	190918	95836	98.44	99.74
c0114L03	1	46	490	525	54	1596	1730	AC204330	187428	113278	99.54	98.96
c0141G22	1	46	493	530	1480	1607	1715	AC206331	188146	120197	99.88	99.69
c0233I07	1	46	514	550	54	1672	1773	AC194594	140514	19518	99.42	99.75
c0163D14	1	46	547	585	54	1757	1874	AC186335	202297	161909	99.85	99.24
c0370E03	1	46	575	611	54	1746	1879	AC191072	197278	88059	100	98.03
c0054M09	1	46	585	617	54	1859	1986	AC194239	162066	14410	96.68	0
b0214B10	1	46	614	633	NA	NA	NA	AC226712	112738	0	99.51	99.03
c0494G06	1	46	629	658	54	1978	2092	AC194838	157232	18054	95.71	100
b0131C15	1	46	654	679	54	2082	2207	AC190554	154647	6771	0	90.58	AC155379
c0326F20	1	46	695	734	54	2183	2319	AC194167	164912	30786	100	99.73
c0201N07	1	46	725	760	54	2276	2399	AC210187	168172	63729	99.88	100
c0285O08	1	46	747	782	54	2350	2508	AC208440	213201	28340	99.03	99.25
c0176A07	1	46	781	816	54	2480	2590	AC194419	187762	46214	98.67	98.11
c0254E06	1	46	806	844	54	2562	2679	AC186624	178130	57894	96.61	99.84
b0332C21	1	46	842	862	54	2640	2731	AC195164	125663	11489	99.82	99.65
c0116F19	1	46	855	893	54	2710	2830	AC214542	175164	102425	99.73	100
c0123I12	1	46	868	908	NA	NA	NA	AC225222	184901	35487	100	98.62
c0234J10	1	46	897	929	54	2839	2936	AC199559	159824	39996	97.87	96.74
b0272C03	1	46	930	947	54	2891	2989	AC195572	137239	52009	98.35	98.42
b0310F15	1	46	950	980	54	2942	3031	AC208567	135666	43674	99.57	99.85
c0382D21	1	46	970	1008	54	2987	3106	AC186419	172706	5862	99.61	100
b0254J21	1	46	1005	1030	54	3100	3196	AC202421	93432	20489	97.42	99.52
c0403D09	1	46	1024	1055	54	3149	3258	AC209941	144219	109194	99.75	99.75
c0047N07	1	46	1036	1068	NA	NA	NA	AC219024	159336	43170	99.78	99.66
c0099M05	1	46	1060	1087	54	3257	3379	AC214819	183119	25237	99.88	98.07
c0085D11	1	46	1094	1124	54	3366	3458	AC205713	165561	17633	98.68	98.28
c0361N09	1	46	1119	1157	NA	NA	NA	AC212453	186979	8986	99.88	99.35
b0186L06	1	46	1165	1189	55	11	119	AC205594	161546	108568	99.85	99.88
c0097A18	1	46	1172	1208	55	52	177	AC209814	180610	5388	100	100
c0207E09	1	46	1203	1238	55	178	299	AC208203	152358	51533	99.32	99.37
b0611J05	1	46	1226	1255	55	251	346	AC199893	144522	8910	99.75	99.84
c0417E23	1	46	1249	1293	55	341	457	AC192559	186584	63374	99.47	99.28
b0615I06	1	46	1275	1305	55	402	486	AC200033	125470	130403	99.87	99.72
c0310F08	1	46	1278	1319	55	421	545	AC186422	203304	12302	100	99.22
b0147D24	1	46	1322	1347	NA	NA	NA	AC192362	130994	31502	98.98	98.94
c0549K17	1	46	1341	1370	55	578	664	AC197765	159047	87900	99.84	99.64
c0029M03	1	46	1356	1385	55	616	687	AC211580	155708	17890	99.58	99.18
b0540B18	1	46	1375	1395	NA	NA	NA	AC217950	102141	34834	99.41	99.84
c0105K23	1	46	1379	1415	55	698	810	AC209783	151111	90291	99.6	99.45
c0347M13	1	46	1396	1438	NA	NA	NA	AC209904	233211	59695	98.72	97.73
c0474K23	1	46	1437	1462	55	842	940	AC194848	164703	61607	99.36	99.88
b0151F05	1	46	1460	1485	55	905	1001	AC190570	152637	28599	98.34	99.84
c0037E23	1	46	1479	1516	55	968	1087	AC208791	169921	54322	100	99.73
b0335G10	1	46	1506	1525	NA	NA	NA	AC217355	116716	40628	99.72	99.6
c0044D08	1	46	1518	1548	55	1081	1209	AC205719	157140	7526	99.87	97.91
c0486J20	1	46	1552	1592	NA	NA	NA	AC213624	186156	30918	99.47	99.21
c0025A10	1	46	1580	1618	55	1286	1406	AC194851	156303	7270	97.54	96.2
c0303N15	1	46	1627	1666	55	1401	1540	AC186427	181047	22467	99.86	99.88
c0422D18	1	46	1659	1695	55	1522	1628	AC209165	160226	74101	98.8	95.71
c0157F17	1	46	1674	1721	55	1624	1722	AC208020	184498	31270	98.93	97.7
Z_AI-0687J15	1	46	1697	1725	NA	NA	NA	AC219174	31474	32018	99.64	99.74
c0547G17	1	46	1701	1733	NA	NA	NA	AC233892	161839	41044	0	99.88
c0478C08	1	46	1720	1757	55	1716	1859	AC203085	187530	7282	98.69	98.65
c0118P12	1	46	1754	1794	55	1819	1940	AC194470	183544	119429	98.29	99.61
c0102D02	1	46	1780	1793	55	1879	2000	AC202134	191630	72582	99.73	99.2
c0460K19	1	46	1788	1822	55	1944	2066	AC209989	166198	64118	98.68	99.22
c0387D19	1	46	1806	1844	55	2017	2116	AC207226	153509	27762	99.25	97.71
b0105G23	1	46	1840	1865	NA	NA	NA	AC217257	137588	71335	99.65	99.44
c0068M14	1	46	1853	1884	55	2167	2267	AC205718	179720	1655	99.86	99.49
b0131D17	1	46	1888	1914	55	2258	2394	AC185516	156925	3826	100	98.85
b0029B22	1	46	1912	1934	56	19	81	AC191525	103996	35919	99.85	99.57
c0005E10	1	46	1939	1981	56	39	160	AC204606	220878	124353	99.46	0
b0325B19	1	46	1948	1975	56	54	158	AC195162	144029	14115	99.85	99.1
b0600C13	1	46	2019	2044	56	135	235	AC190528	146644	34455	99.24	99.31
c0319L19	1	46	2033	2071	56	207	310	AC198361	170729	92888	99.38	99.65
c0214D19	1	46	2056	2094	NA	NA	NA	AC177883	188103	30038	100	99.09
c0268P23	1	46	2088	2121	56	333	450	AC200203	193006	23861	0	99.86
c0293J05	1	46	2126	2154	56	436	548	AC204709	153370	44882	99.87	99.74
c0113K11	1	46	2147	2180	56	511	623	AC194612	183371	53882	96.89	100
c0308I03	1	46	2165	2211	56	577	687	AC186318	177306	26544	99.73	99.75
c0421D08	1	46	2207	2241	56	666	801	AC194076	181513	74570	99.59	100
c0102F21	1	46	2226	2262	56	744	876	AC196799	205665	64776	98.21	99.47
b0581N22	1	46	2257	2284	56	833	920	AC191603	128605	Right end	100
c0307M07	1	48	0	30	857	452	558	AC185461	181110	41026		0
b0197O24	1	48	19	48	857	404	535	AC187397	130076	27514	99.73	0
c0247I06	1	48	46	86	591	43	189	AC186905	222143	28958	99.86	0
c0024M02	1	48	74	110	591	149	280	AC200256	201481	25135	0	99.69
c0322H06	1	48	105	144	591	252	363	AC205978	146492	13174	98.06	99.28
c0249E10	1	48	133	167	591	357	460	AC205841	156398	68717	99.13	98.49
b0381P19	1	48	152	176	NA	NA	NA	AC226202	128625	62926	99.66	100
c0221H05	1	48	163	196	591	449	583	AC214242	157411	46606	99.72	99.11
c0386C06	1	48	188	219	591	522	680	AC194128	155049	29691	97.78	99.83
c0166K22	1	48	217	249	NA	NA	NA	AC186332	172127	52854	0	99.84
c0256O11	1	48	246	277	NA	NA	NA	AC194166	182002	22102	99.59	98.57
b0400E08	1	48	281	304	NA	NA	NA	AC209092	127265	18162	99.71	99.59
b0598L16	1	48	290	316	NA	NA	NA	AC218458	117144	10025	97.88	97.08
b0095G05	1	48	315	336	57	0	144	AC204027	118212	67629	100	99.34
c0120O21	1	48	322	361	57	92	235	AC177929	195003	16617	99.64	97.25
c0477M01	1	48	351	393	57	175	323	AC211546	187436	7908	0	94.77
c0138B02	1	48	394	435	57	294	416	AC215882	200345	55050	98.15	98.12
c0175G15	1	48	420	457	57	399	508	AC214772	185346	25769	98.49	99.87
b0496J08	1	48	446	469	57	458	536	AC210097	122482	34131	99.69	98.76
b0193M20	1	48	462	484	57	515	605	AC203832	161743	10194	100	99.72
c0017M06	1	48	484	527	57	609	749	AC194413	201242	17062	98.07	99.44
c0069I06	1	48	531	568	57	717	864	AC206775	188893	17732	97.5	99.75
c0243D19	1	48	567	592	57	818	935	AC205840	143793	66182	0	99.26
c0428N19	1	48	582	616	57	882	993	AC211684	194451	70160	99.87	99.1
c0248J11	1	48	620	657	57	961	1066	AC210171	187133	Right end	99.86
c0268E09	1	49	0	34	58	28	111	AC186615	177590	13872		100
c0314K02	1	49	34	56	58	130	219	AC196098	184102	36953	100	99.29
c0243D17	1	49	51	83	58	169	296	AC205619	192525	17271	99.83	98.81
c0268D15	1	49	87	120	58	279	387	AC205359	154092	115014	99.65	100
c0436P02	1	49	99	134	58	308	454	AC212390	183683	50887	95.47	99.61
c0251N01	1	49	127	165	58	429	552	AC213609	194069	68997	99.57	99.58
b0017F13	1	49	148	185	58	475	603	AC194709	180773	29687	100	99.78
b0298N17	1	49	178	208	58	574	690	AC190730	149706	33620	99.75	100
c0281K19	1	49	202	245	58	645	765	AC177828	205973	59161	98.39	99.88
c0114J23	1	49	232	260	58	732	848	AC191086	173899	84397	98.68	0
c0205D17	1	49	243	273	58	745	893	AC195791	199716	97854	98.93	98.14
c0317G02	1	49	270	280	58	811	937	AC195307	178311	83303	99.56	100
c0229G16	1	49	275	312	NA	NA	NA	AC186628	159591	25809	99.5	98.85
c0162P13	1	49	325	360	58	948	1048	AC214267	172878	55065	100	0
c0436J18	1	49	352	384	58	1013	1123	AC208666	165624	22305	99.17	98.81
b0166L17	1	49	379	399	NA	NA	NA	AC217278	71858	4508	99.76	100
c0466J08	1	49	410	446	58	1155	1292	AC200736	212689	105712	99.66	98.96
c0024K24	1	49	425	467	58	1237	1368	AC194596	221435	6971	99.06	99.74
c0227H15	1	49	460	492	58	1357	1490	AC202401	188889	18620	99.75	99.39
b0247M03	1	49	503	527	58	1453	1564	AC207807	131792	28008	100	100
b0028I10	1	49	523	541	58	1534	1617	AC205656	112452	54221	99.88	99.86
c0044J02	1	49	534	565	58	1578	1692	AC205688	154837	71200	99.72	98.54
c0402F03	1	49	555	592	58	1646	1768	AC209939	188056	6958	99.76	90.83
c0016E01	1	49	589	633	58	1750	1894	AC214364	197659	55147	98.87	99.86
c0212I22	1	49	619	654	58	1860	1952	AC211378	166586	34430	97.91	99.73
c0138F21	1	49	644	681	58	1931	2038	AC205728	159949	18172	99.18	98.69
c0380H05	1	49	677	719	58	2010	2133	AC206594	176097	1233	98.28	99.31
c0245C01	1	49	715	753	58	2116	2243	AC195814	172391	15751	100	98
c0189B10	1	49	758	792	58	2220	2355	AC186187	185802	31923	99.29	99.17
c0150G18	1	49	786	824	NA	NA	NA	AC192382	179701	79044	99.74	99.07
c0386O06	1	49	807	847	58	2378	2504	AC197546	199195	64743	99.78	100
c0365M08	1	49	839	877	58	2455	2615	AC203760	190442	56490	98.61	100
c0104P14	1	49	863	893	NA	NA	NA	AC219005	153272	56975	99.89	99.61
b0449E05	1	49	891	926	58	2660	2729	AC210216	140912	51060	99.66	98.9
c0160A06	1	49	920	957	NA	NA	NA	AC221060	198313	13085	99.37	99.35
c0276J15	1	49	952	982	58	2761	2870	AC206029	161745	34951	99.34	100
b0390O04	1	49	978	1007	58	2843	2933	AC202115	162118	10185	100	99.86
c0409F11	1	49	1015	1045	58	2929	3023	AC197574	157073	49735	99.84	99.85
c0259C15	1	49	1034	1064	58	2980	3097	AC192245	150246	38444	98.07	100
c0377D15	1	49	1052	1087	58	3080	3184	AC186221	190533	143504	96.58	100
b0327K24	1	49	1065	1090	58	3088	3194	AC198359	159687	55626	100	99.77
c0183K18	1	49	1094	1130	58	3138	3259	AC192460	180366	49700	99.72	99.49
c0472J19	1	49	1127	1165	724	14	131	AC199175	173537	41128	99.62	99.89
c0333M01	1	49	1164	1195	724	187	280	AC209893	216640	31017	100	98.91
c0104L13	1	49	1193	1226	NA	NA	NA	AC195608	178917	61803	99.39	98.31
b0115K05	1	49	1224	1238	NA	NA	NA	AC219081	124119	39739	99.33	99.76
c0280L02	1	49	1236	1275	724	413	540	AC213386	202262	9223	99.05	100
b0506L21	1	49	1302	1319	724	514	615	AC196464	116988	16872	99.75	99.75
c0265I16	1	49	1333	1370	724	577	707	AC186618	191179	31101	99.66	99.75
c0018E06	1	49	1362	1383	724	693	754	AC194921	100989	6640	100	99.88
b0170F13	1	49	1379	1406	724	735	830	AC200280	137515	58940	99.75	99.12
b0185L20	1	49	1394	1421	NA	NA	NA	AC225800	112408	28901	100	99.3
b0028H10	1	49	1407	1442	NA	NA	NA	AC225882	126911	32881	99.53	100
c0483I18	1	49	1434	1472	NA	NA	NA	AC218009	174689	26253	98.54	99.74
c0117B12	1	49	1471	1506	724	992	1113	AC202192	179834	14242	97.88	99.03
c0118B21	1	49	1509	1550	724	1080	1229	AC195607	180251	Right end	99.64
c0541G21	1	50	7	33	59	0	119	AC187338	185486	17503		99.64
c0011H11	1	50	38	74	59	192	333	AC194469	219297	34504	98.4	98.38
c0011O22	1	50	66	113	59	303	445	AC214637	224326	37395	99.73	99.61
c0285K18	1	50	103	133	59	423	550	AC207256	173514	61454	98.35	100
c0363E11	1	50	115	144	NA	NA	NA	AC234176	200543	105881	100	98.87
c0180G12	1	50	116	150	59	540	671	AC214126	192364	31344	97.65	98.48
b0298H12	1	50	160	179	59	637	724	AC207023	138654	85963	99.13	98.87
b0128P12	1	50	169	197	NA	NA	NA	AC217264	154636	77026	100	100
c0282N20	1	50	179	220	NA	NA	NA	AC186432	191139	81824	99.74	100
c0473D23	1	50	207	235	59	773	885	AC195482	180611	48757	97.92	0
c0384H06	1	50	234	258	59	853	953	AC193461	168805	62270	99.27	99.86
c0122M21	1	50	248	290	59	927	1035	AC177927	197766	19694	99.36	98.83
b0343J22	1	50	285	312	59	1028	1098	AC190760	138047	61419	98.87	100
c0322F10	1	50	297	339	59	1065	1168	AC201898	163674	21056	98.64	99.27
c0123O23	1	50	346	380	NA	NA	NA	AC217794	166614	89618	99.49	97.94
b0093G09	1	50	362	398	59	1188	1345	AC197139	171233	14858	99.73	99.62
c0455B21	1	50	398	441	59	1389	1499	AC186652	217679	32493	98.14	99.75
c0108O03	1	50	457	494	59	1570	1659	AC199421	130869	1386	99.76	99.65
c0307K20	1	50	500	539	59	1640	1746	AC213836	161556	77775	98.32	99.73
c0474H06	1	50	523	562	59	1695	1838	AC206839	196456	62484	100	0
c0008A15	1	50	540	553	NA	NA	NA	AC185657	109293	23008	99.23	99.23
b0241B02	1	50	548	570	59	1783	1866	AC192359	107204	47006	99.8	97.6
c0548E22	1	50	556	582	NA	NA	NA	AC220977	151837	51226	99.88	99.07
c0545N04	1	50	575	604	59	1861	1989	AC186413	179014	16398	99.53	100
b0336E11	1	50	605	625	60	1363	1461	AC194312	137956	24376	97.84	0
c0469O13	1	50	619	645	60	1306	1403	AC209079	103712	49595	99.62	99.88
c0101P23	1	50	634	668	60	1204	1349	AC208824	178697	51393	0	99.27
c0497D12	1	50	657	691	60	1161	1271	AC207801	174688	50197	99.4	97.5
c0125K16	1	50	684	714	60	1058	1147	AC213801	188539	28872	98.01	99.49
b0134N01	1	50	705	734	60	942	1076	AC202918	144431	12733	99.87	99.01
c0395E15	1	50	735	769	60	868	985	AC196066	164703	69730	100	99.44
c0178F04	1	50	750	785	60	817	926	AC201824	165212	47374	98.92	97.63
c0274F12	1	50	780	801	60	738	873	AC217624	213749	157946	98.25	99.67
c0212G18	1	50	796	832	60	725	839	AC210272	175206	48547	99.7	99.59
b0169E17	1	50	817	838	NA	NA	NA	AC219064	112005	58552	99.46	99.64
c0479K06	1	50	834	858	NA	NA	NA	AC213847	223909	56666	98.95	97.56
b0029D21	1	50	849	874	NA	NA	NA	AC193382	132210	33461	99.62	99.82
c0264P15	1	50	878	909	60	538	627	AC186307	186403	9693	0	98.93
c0273I13	1	50	907	934	60	437	549	AC195917	173804	7452	97.02	99.86
b0346J23	1	50	930	952	60	371	447	AC201755	131999	22800	100	99.76
c0300D02	1	50	960	990	60	205	357	AC204591	163993	19658	99.4	99.42
c0068O13	1	50	990	1024	60	121	238	AC195542	165998	5977	99.87	97.77
c0257H13	1	50	1033	1058	60	0	128	AC186522	169907	Right end	98.36
c0190P06	1	51	8	44	62	28	135	AC190821	190348	25348		99.19	AC155580
c0128M08	1	51	35	63	62	105	225	AC197496	186838	81459	99.76	100
c0134F08	1	51	50	79	NA	NA	NA	AC206876	172823	43946	99.77	99.63
b0598J12	1	51	71	100	62	251	370	AC207374	164079	39982	100	100
c0528N19	1	51	103	143	62	336	475	AC211910	208899	34919	98.64	99.61
c0120A17	1	51	132	173	62	422	563	AC204213	214354	57747	97.75	99.16
b0016F24	1	51	181	204	62	520	634	AC206640	166577	104180	99.86	99.69
c0237M16	1	51	189	222	62	566	694	AC211153	176180	20619	99.18	98.1
c0311F16	1	51	217	249	62	664	780	AC207106	122459	10551	99.88	98.73
c0164N13	1	51	240	250	NA	NA	NA	AC221056	160673	122634	99.87	100
c0040K21	1	51	244	288	NA	NA	NA	AC200562	185683	57024	98.95	99.58
b0589P14	1	51	279	314	62	861	960	AC195332	163454	4181	96.59	99.51
c0152B22	1	51	311	343	62	951	1054	AC186339	190386	Right end	98.85
b0120E12	1	52	1	28	977	165	284	AC185517	153333	22833		99.55
c0260N14	1	52	33	57	977	56	197	AC208530	184021	47594	99.84	97.19
b0345O14	1	52	52	74	977	7	108	AC208699	120725	4573	99.75	99.76
c0019J18	1	52	78	110	61	1708	1844	AC207347	160916	55844	99.87	99.04
b0538K22	1	52	95	116	NA	NA	NA	AC231404	128356	11066	98.29	99.71
b0341B12	1	52	124	152	61	1601	1738	AC207019	112968	52803	99.57	0
c0311D14	1	52	134	168	61	1553	1666	AC207105	161126	17231	99.86	99.71
c0041B24	1	52	166	210	61	1413	1582	AC199774	185570	103606	99.76	99.57
b0523N05	1	52	194	217	61	1405	1492	AC191522	120185	109461	97.98	98.61
c0353N23	1	52	200	211	329	232	351	AC210818	220568	109038	0	99.83
c0138H17	1	52	206	251	61	1268	1431	AC177919	185113	4526	99.35	99.84
b0526E13	1	52	248	276	61	1189	1296	AC190786	139063	29103	100	99.59
c0221O06	1	52	273	315	61	1105	1241	AC194819	191394	28013	96	99.7
b0193A03	1	52	327	355	61	996	1087	AC200187	142614	92458	99.32	100
c0033C02	1	52	339	367	NA	NA	NA	AC218930	176631	39475	99.05	99.43
b0310F17	1	52	358	383	61	839	929	AC185610	128580	18973	99.84	99.84
c0078M15	1	52	385	418	61	765	902	AC207561	179118	34514	93.52	99.39
b0277I15	1	52	407	427	61	721	800	AC208687	114135	33370	0	99.86
b0240M16	1	52	439	459	NA	NA	NA	AC217289	130118	63115	99.88	99.38
c0247M20	1	52	448	481	61	636	735	AC209019	183831	66721	98.37	0
c0363F21	1	52	465	502	NA	NA	NA	AC219146	165141	108571	98.71	98.48
c0467M01	1	52	483	507	61	531	634	AC201886	203761	113513	99.1	99.63
c0055F15	1	52	495	527	NA	NA	NA	AC230016	184459	60185	99.6	99.87
c0017L07	1	52	512	556	61	407	529	AC194412	192306	51077	98.99	99.61
c0088N18	1	52	550	582	61	323	450	AC213890	190801	55225	100	99.22
c0263N21	1	52	572	609	61	222	360	AC209762	191492	43982	97.25	98.08
c0131P13	1	52	601	647	61	146	249	AC211503	190463	85574	100	99.55
c0496L16	1	52	621	661	61	80	200	AC203287	183658	17496	98.81	99.81
b0611E16	1	52	661	689	61	0	94	AC191429	135388	Right end	99.55
b0131A09	1	54	3	23	245	2002	2087	AC185515	168195	19591		100
c0218K21	1	54	22	53	245	1901	2032	AC208970	187622	39696	98.77	98.25
[truncated: 14,913 more rows]
